# Supplementary material for: Changes in Soybean (Glycine max L.) Flour Fatty-Acid Content Based on Storage Temperature and Duration
Source: PubMed Central journal article supplement (PMC6222662; doi:10.3390/molecules23102713), 2018-10-21
Supplement: molecules-23-02713-s001.pdf [file molecules-23-02713-s001.pdf]

## Electronic Supplementary Information (ESI) for molecules

### Changes in soybean (*Glycine max* L.) flour fatty acid content based on storage temperature and duration

Mayakrishnan Prabakaran<sup>1</sup>, Kyoung-Jin Lee<sup>1</sup>, Yeonju An<sup>1</sup>, Chang Kwon<sup>1</sup>, Soyeon Kim<sup>1</sup>, Yujin Yang<sup>1</sup>, Ateeque Ahmad<sup>2</sup>, Seung-Hyun Kim<sup>1</sup> and Ill-Min Chung<sup>1,\*</sup>

<sup>1</sup>Department of Crop Science, College of Sanghuh Life Science, Konkuk University, 120 Neungdong-ro, Gwangjin-gu, Seoul 05029, Republic of Korea; prabakarannitt@gmail.com (M.P.); jin331@konkuk.ac.kr (K.J.L.); ayj3043@konkuk.ac.kr (Y.A.); chang794@konkuk.ac.kr (C.K.); hellosy1@konkuk.ac.kr (S.K.); jin9031@konkuk.ac.kr (Y.Y.); kshkim@konkuk.ac.kr (S-H.K.); imcim@konkuk.ac.kr (I.-M.C.)

<sup>2</sup>Process Chemistry and Technology Department, CSIR-Central Institute of Medicinal and Aromatic Plants, Lucknow 226015, India; ateeque97@gmail.com (A.A.)

\*Correspondence: imcim@konkuk.ac.kr; Tel.: +82-2-450-3730; Fax: 82-2-446-7856

**Table S1.** Fatty acid content of raw soybean flour packaged in polyethylene film and stored under refrigerated conditions ( $\text{mg}\cdot\text{g}^{-1}$ , dry basis,  $p < 0.05$ ,  $n = 3$ ).

|                        |                          | Storage duration          |                           |                          |                           |                           |                           |                           |                          |                           | LSD  |
|------------------------|--------------------------|---------------------------|---------------------------|--------------------------|---------------------------|---------------------------|---------------------------|---------------------------|--------------------------|---------------------------|------|
|                        |                          | Initial                   | 1W                        | 2W                       | 4W                        | 8W                        | 12W                       | 24W                       | 36W                      | 48W                       |      |
| Refrigeration<br>(4°C) | C6:0                     | 0.02 ± 0.00 <sup>ab</sup> | 0.03±0.00 <sup>ab</sup>   | 0.02±0.00 <sup>ab</sup>  | 0.03±0.00 <sup>ab</sup>   | 0.04±0.00 <sup>a</sup>    | 0.05±0.06 <sup>a</sup>    | 0.02±0.01 <sup>ab</sup>   | 0.02±0.00 <sup>ab</sup>  | 0.00±0.00 <sup>b</sup>    | 0.04 |
|                        | C14:0                    | 0.17±0.02 <sup>a</sup>    | 0.19±0.00 <sup>a</sup>    | 0.18±0.02 <sup>a</sup>   | 0.18±0.01 <sup>a</sup>    | 0.13±0.01 <sup>b</sup>    | 0.10±0.01 <sup>c</sup>    | 0.12±0.00 <sup>b</sup>    | 0.13±0.01 <sup>b</sup>   | 0.14±0.00 <sup>b</sup>    | 0.02 |
|                        | C16:0                    | 16.60±0.18 <sup>cd</sup>  | 16.38±0.17 <sup>de</sup>  | 17.06±0.56 <sup>cd</sup> | 18.80±0.72 <sup>b</sup>   | 17.47±0.03 <sup>c</sup>   | 14.03±1.34 <sup>f</sup>   | 16.22±0.21 <sup>de</sup>  | 15.59±0.15 <sup>e</sup>  | 20.58±0.30 <sup>a</sup>   | 0.96 |
|                        | C16:1                    | 0.10±0.00 <sup>c</sup>    | 0.11±0.02 <sup>bc</sup>   | 0.09±0.01 <sup>c</sup>   | 0.13±0.00 <sup>ab</sup>   | 0.11±0.00 <sup>bc</sup>   | 0.11±0.03 <sup>bc</sup>   | 0.10±0.00 <sup>c</sup>    | 0.12±0.01 <sup>bc</sup>  | 0.15±0.02 <sup>a</sup>    | 0.03 |
|                        | C17:0                    | 0.16±0.01 <sup>b</sup>    | 0.17±0.00 <sup>b</sup>    | 0.17±0.01 <sup>b</sup>   | 0.19±0.01 <sup>b</sup>    | 0.18±0.01 <sup>b</sup>    | 0.15±0.01 <sup>b</sup>    | 0.17±0.00 <sup>b</sup>    | 0.16±0.00 <sup>b</sup>   | 0.52±0.09 <sup>a</sup>    | 0.05 |
|                        | C18:0                    | 5.76±0.07 <sup>cd</sup>   | 5.63±0.06 <sup>d</sup>    | 5.69±0.20 <sup>d</sup>   | 6.59±0.25 <sup>a</sup>    | 6.06±0.12 <sup>bc</sup>   | 4.67±0.41 <sup>f</sup>    | 5.48±0.05 <sup>de</sup>   | 5.25±0.04 <sup>e</sup>   | 6.31±0.11 <sup>ab</sup>   | 0.32 |
|                        | C18:1c&t                 | 35.96±0.41 <sup>d</sup>   | 36.66±0.48 <sup>cd</sup>  | 37.99±1.36 <sup>d</sup>  | 41.56±1.62 <sup>a</sup>   | 38.15±0.06 <sup>bc</sup>  | 29.89±2.67 <sup>e</sup>   | 35.79±0.36 <sup>d</sup>   | 35.08±0.32 <sup>d</sup>  | 38.91±0.43 <sup>b</sup>   | 2.02 |
|                        | C18:2c&t                 | 64.36±0.94 <sup>ef</sup>  | 69.54±2.24 <sup>cd</sup>  | 72.61±2.64 <sup>bc</sup> | 80.88±3.10 <sup>a</sup>   | 73.88±0.18 <sup>bc</sup>  | 63.11±5.83 <sup>f</sup>   | 67.20±1.45 <sup>def</sup> | 67.61±0.66 <sup>de</sup> | 75.51±0.79 <sup>b</sup>   | 4.41 |
|                        | C18:3n3                  | 12.07±0.19 <sup>bc</sup>  | 11.97±0.59 <sup>bc</sup>  | 12.26±0.48 <sup>b</sup>  | 13.98±0.55 <sup>a</sup>   | 12.66±0.05 <sup>b</sup>   | 11.34±1.03 <sup>c</sup>   | 12.22±0.43 <sup>b</sup>   | 12.12±0.13 <sup>bc</sup> | 13.56±0.15 <sup>a</sup>   | 0.85 |
|                        | C20:0                    | 0.63±0.01 <sup>b</sup>    | 0.61±0.01 <sup>b</sup>    | 0.65±0.02 <sup>b</sup>   | 0.70±0.03 <sup>a</sup>    | 0.65±0.01 <sup>b</sup>    | 0.49±0.04 <sup>d</sup>    | 0.57±0.01 <sup>c</sup>    | 0.62±0.04 <sup>b</sup>   | 0.64±0.01 <sup>b</sup>    | 0.04 |
|                        | C20:1n9                  | 0.52±0.04 <sup>ab</sup>   | 0.55±0.04 <sup>a</sup>    | 0.51±0.02 <sup>ab</sup>  | 0.53±0.04 <sup>ab</sup>   | 0.54±0.01 <sup>a</sup>    | 0.33±0.03 <sup>c</sup>    | 0.47±0.05 <sup>b</sup>    | 0.35±0.03 <sup>c</sup>   | 0.35±0.00 <sup>c</sup>    | 0.05 |
|                        | C20:2                    | 0.06±0.01 <sup>c</sup>    | 0.06±0.00 <sup>abc</sup>  | 0.07±0.00 <sup>ab</sup>  | 0.07±0.00 <sup>ab</sup>   | 0.07±0.00 <sup>a</sup>    | 0.06±0.01 <sup>bc</sup>   | 0.06±0.01 <sup>c</sup>    | 0.06±0.00 <sup>bc</sup>  | 0.07±0.00 <sup>ab</sup>   | 0.01 |
|                        | C20:3n6&21:0             | 0.08±0.01 <sup>cd</sup>   | 0.09±0.01 <sup>abc</sup>  | 0.09±0.01 <sup>ab</sup>  | 0.09±0.01 <sup>a</sup>    | 0.08±0.01 <sup>abcd</sup> | 0.07±0.02 <sup>d</sup>    | 0.08±0.00 <sup>cd</sup>   | 0.08±0.00 <sup>bcd</sup> | 0.09±0.01 <sup>ab</sup>   | 0.01 |
|                        | C22:0                    | 1.02±0.02 <sup>c</sup>    | 0.99±0.01 <sup>cde</sup>  | 1.04±0.05 <sup>c</sup>   | 1.11±0.06 <sup>b</sup>    | 1.02±0.01 <sup>cd</sup>   | 0.78±0.07 <sup>f</sup>    | 0.95±0.01 <sup>e</sup>    | 0.95±0.02 <sup>de</sup>  | 1.24±0.02 <sup>a</sup>    | 0.06 |
|                        | C22:1n9                  | 0.03±0.01 <sup>e</sup>    | 0.06±0.01 <sup>bc</sup>   | 0.05±0.02 <sup>cd</sup>  | 0.06±0.00 <sup>bc</sup>   | 0.06±0.01 <sup>bc</sup>   | 0.08±0.01 <sup>a</sup>    | 0.05±0.01 <sup>bcd</sup>  | 0.04±0.01 <sup>de</sup>  | 0.06±0.00 <sup>b</sup>    | 0.01 |
|                        | C23:0                    | 0.13±0.01 <sup>cd</sup>   | 0.13±0.01 <sup>d</sup>    | 0.13±0.01 <sup>cd</sup>  | 0.16±0.02 <sup>b</sup>    | 0.13±0.00 <sup>cd</sup>   | 0.30±0.04 <sup>a</sup>    | 0.12±0.01 <sup>d</sup>    | 0.12±0.00 <sup>d</sup>   | 0.15±0.01 <sup>cb</sup>   | 0.03 |
|                        | C24:0                    | 0.29±0.01 <sup>bc</sup>   | 0.31±0.01 <sup>bc</sup>   | 0.31±0.02 <sup>bc</sup>  | 0.32±0.02 <sup>b</sup>    | 0.30±0.01 <sup>bc</sup>   | 0.24±0.03 <sup>d</sup>    | 0.36±0.02 <sup>a</sup>    | 0.29±0.00 <sup>c</sup>   | 0.32±0.01 <sup>b</sup>    | 0.03 |
|                        | Total                    | 137.98±1.75 <sup>d</sup>  | 143.48±3.25 <sup>cd</sup> | 148.93±5.41 <sup>c</sup> | 165.37±6.40 <sup>a</sup>  | 151.51±0.25 <sup>bc</sup> | 125.80±11.47 <sup>e</sup> | 139.98±2.19 <sup>d</sup>  | 138.58±1.38 <sup>d</sup> | 158.59±1.59 <sup>ab</sup> | 8.57 |
|                        | ∑SFA                     | 24.88±0.24 <sup>cd</sup>  | 24.53±0.23 <sup>de</sup>  | 25.36±0.90 <sup>cd</sup> | 28.17±1.11 <sup>b</sup>   | 26.05±0.16 <sup>c</sup>   | 20.88±1.91 <sup>f</sup>   | 24.09±0.26 <sup>de</sup>  | 23.20±0.26 <sup>e</sup>  | 29.99±0.36 <sup>a</sup>   | 1.41 |
| ∑UFA                   | 113.10±1.51 <sup>d</sup> | 118.95±3.21 <sup>cd</sup> | 123.57±4.51 <sup>bc</sup> | 137.20±5.30 <sup>a</sup> | 125.46±0.21 <sup>bc</sup> | 104.92±9.56 <sup>e</sup>  | 115.89±2.10 <sup>d</sup>  | 115.38±1.12 <sup>d</sup>  | 128.60±1.36 <sup>b</sup> | 7.23                      |      |

∑SFA; sum of saturated fatty acids, ∑UFA; sum of unsaturated fatty acids.

**Table S2.** Fatty acid content of raw soybean flour packaged in polyethylene film and stored under room temperature conditions ( $\text{mg}\cdot\text{g}^{-1}$ , dry basis,  $p < 0.05$ ,  $n = 3$ ).

|                               | Initial      | Storage duration          |                            |                           |                            |                            |                          |                           |                          | LSD                       |       |
|-------------------------------|--------------|---------------------------|----------------------------|---------------------------|----------------------------|----------------------------|--------------------------|---------------------------|--------------------------|---------------------------|-------|
|                               |              | 1W                        | 2W                         | 4W                        | 8W                         | 12W                        | 24W                      | 36W                       | 48W                      |                           |       |
| Room<br>temperature<br>(20°C) | C6:0         | 0.02±0.00 <sup>b</sup>    | 0.03±0.00 <sup>b</sup>     | 0.02±0.00 <sup>b</sup>    | 0.03±0.00 <sup>b</sup>     | 0.04±0.00 <sup>a</sup>     | 0.02±0.00 <sup>c</sup>   | 0.03±0.00 <sup>b</sup>    | 0.02±0.01 <sup>b</sup>   | 0.00±0.00 <sup>d</sup>    | 0.01  |
|                               | C14:0        | 0.17±0.02 <sup>a</sup>    | 0.19±0.03 <sup>a</sup>     | 0.18±0.01 <sup>a</sup>    | 0.13±0.01 <sup>b</sup>     | 0.13±0.00 <sup>b</sup>     | 0.10±0.00 <sup>c</sup>   | 0.12±0.01 <sup>bc</sup>   | 0.12±0.00 <sup>bc</sup>  | 0.14±0.00 <sup>b</sup>    | 0.02  |
|                               | C16:0        | 16.60±0.18 <sup>bcd</sup> | 16.52±0.24 <sup>cd</sup>   | 17.85±2.07 <sup>b</sup>   | 16.23±0.86 <sup>cd</sup>   | 17.24±0.15 <sup>bc</sup>   | 12.79±0.17 <sup>e</sup>  | 16.04±0.02 <sup>cd</sup>  | 15.41±0.14 <sup>d</sup>  | 20.22±0.38 <sup>a</sup>   | 1.32  |
|                               | C16:1        | 0.10±0.00 <sup>bc</sup>   | 0.11±0.01 <sup>bc</sup>    | 0.14±0.03 <sup>a</sup>    | 0.11±0.01 <sup>bc</sup>    | 0.10±0.00 <sup>bc</sup>    | 0.09±0.02 <sup>c</sup>   | 0.10±0.00 <sup>bc</sup>   | 0.12±0.01 <sup>ab</sup>  | 0.14±0.01 <sup>a</sup>    | 0.03  |
|                               | C17:0        | 0.16±0.01 <sup>c</sup>    | 0.17±0.01 <sup>bc</sup>    | 0.17±0.01 <sup>bc</sup>   | 0.16±0.01 <sup>c</sup>     | 0.18±0.00 <sup>b</sup>     | 0.15±0.01 <sup>d</sup>   | 0.16±0.00 <sup>cd</sup>   | 0.16±0.00 <sup>cd</sup>  | 0.40±0.01 <sup>a</sup>    | 0.01  |
|                               | C18:0        | 5.76±0.07 <sup>abcd</sup> | 5.71±0.09 <sup>bcd</sup>   | 5.97±0.69 <sup>abc</sup>  | 5.57±0.29 <sup>cde</sup>   | 6.07±0.08 <sup>ab</sup>    | 4.25±0.08 <sup>f</sup>   | 5.41±0.02 <sup>de</sup>   | 5.16±0.06 <sup>e</sup>   | 6.17±0.14 <sup>a</sup>    | 0.45  |
|                               | C18:1c&t     | 35.96±0.41 <sup>bc</sup>  | 36.88±1.07 <sup>abc</sup>  | 39.93±4.86 <sup>a</sup>   | 35.91±1.88 <sup>bc</sup>   | 37.54±0.43 <sup>abc</sup>  | 27.03±0.46 <sup>d</sup>  | 35.34±0.13 <sup>bc</sup>  | 34.60±0.30 <sup>c</sup>  | 38.19±0.32 <sup>ab</sup>  | 3.08  |
|                               | C18:2c&t     | 64.36±0.94 <sup>d</sup>   | 69.49±4.34 <sup>bcd</sup>  | 76.20±9.64 <sup>a</sup>   | 69.84±3.71 <sup>abcd</sup> | 72.59±0.91 <sup>abc</sup>  | 57.07±1.18 <sup>e</sup>  | 66.42±0.47 <sup>cd</sup>  | 66.55±0.48 <sup>cd</sup> | 73.33±0.80 <sup>ab</sup>  | 6.51  |
|                               | C18:3n3      | 12.07±0.19 <sup>a</sup>   | 11.90±0.96 <sup>a</sup>    | 12.86±1.74 <sup>a</sup>   | 12.04±0.64 <sup>a</sup>    | 12.45±0.18 <sup>a</sup>    | 10.24±0.23 <sup>b</sup>  | 12.00±0.14 <sup>a</sup>   | 11.84±0.05 <sup>a</sup>  | 12.92±0.22 <sup>a</sup>   | 1.22  |
|                               | C20:0        | 0.63±0.01 <sup>ab</sup>   | 0.61±0.02 <sup>bc</sup>    | 0.67±0.08 <sup>a</sup>    | 0.61±0.04 <sup>bc</sup>    | 0.64±0.01 <sup>ab</sup>    | 0.43±0.01 <sup>d</sup>   | 0.56±0.01 <sup>c</sup>    | 0.64±0.01 <sup>ab</sup>  | 0.63±0.03 <sup>ab</sup>   | 0.06  |
|                               | C20:1n9      | 0.52±0.04 <sup>ab</sup>   | 0.55±0.04 <sup>a</sup>     | 0.52±0.05 <sup>ab</sup>   | 0.46±0.02 <sup>c</sup>     | 0.53±0.01 <sup>a</sup>     | 0.31±0.01 <sup>e</sup>   | 0.48±0.01 <sup>bc</sup>   | 0.36±0.00 <sup>d</sup>   | 0.32±0.02 <sup>de</sup>   | 0.05  |
|                               | C20:2        | 0.06±0.01 <sup>ab</sup>   | 0.06±0.02 <sup>ab</sup>    | 0.07±0.01 <sup>a</sup>    | 0.06±0.01 <sup>ab</sup>    | 0.06±0.00 <sup>ab</sup>    | 0.05±0.00 <sup>b</sup>   | 0.06±0.00 <sup>ab</sup>   | 0.06±0.00 <sup>ab</sup>  | 0.07±0.00 <sup>a</sup>    | 0.01  |
|                               | C20:3n6&21:0 | 0.08±0.01 <sup>bc</sup>   | 0.09±0.02 <sup>a</sup>     | 0.09±0.01 <sup>a</sup>    | 0.07±0.01 <sup>c</sup>     | 0.07±0.01 <sup>bc</sup>    | 0.06±0.00 <sup>c</sup>   | 0.07±0.01 <sup>c</sup>    | 0.08±0.00 <sup>bc</sup>  | 0.09±0.00 <sup>ab</sup>   | 0.02  |
|                               | C22:0        | 1.02±0.02 <sup>bc</sup>   | 0.99±0.02 <sup>cd</sup>    | 1.08±0.11 <sup>b</sup>    | 0.95±0.05 <sup>d</sup>     | 0.99±0.00 <sup>cd</sup>    | 0.72±0.01 <sup>e</sup>   | 0.93±0.00 <sup>d</sup>    | 0.96±0.03 <sup>cd</sup>  | 1.17±0.02 <sup>a</sup>    | 0.07  |
|                               | C22:1n9      | 0.03±0.01 <sup>c</sup>    | 0.06±0.01 <sup>b</sup>     | 0.05±0.01 <sup>b</sup>    | 0.06±0.00 <sup>b</sup>     | 0.06±0.00 <sup>b</sup>     | 0.09±0.00 <sup>a</sup>   | 0.07±0.02 <sup>b</sup>    | 0.06±0.02 <sup>b</sup>   | 0.09±0.01 <sup>a</sup>    | 0.02  |
|                               | C23:0        | 0.13±0.01 <sup>c</sup>    | 0.13±0.01 <sup>cd</sup>    | 0.13±0.01 <sup>cd</sup>   | 0.11±0.01 <sup>f</sup>     | 0.13±0.01 <sup>cde</sup>   | 0.21±0.01 <sup>a</sup>   | 0.12±0.00 <sup>def</sup>  | 0.12±0.00 <sup>ef</sup>  | 0.15±0.01 <sup>b</sup>    | 0.01  |
|                               | C24:0        | 0.29±0.01 <sup>cd</sup>   | 0.32±0.01 <sup>bc</sup>    | 0.33±0.04 <sup>ab</sup>   | 0.28±0.01 <sup>d</sup>     | 0.28±0.02 <sup>d</sup>     | 0.23±0.01 <sup>e</sup>   | 0.35±0.00 <sup>a</sup>    | 0.29±0.00 <sup>d</sup>   | 0.30±0.01 <sup>cd</sup>   | 0.03  |
|                               | Total        | 137.98±1.75 <sup>c</sup>  | 143.82±6.67 <sup>abc</sup> | 156.27±19.30 <sup>a</sup> | 142.61±7.52 <sup>bc</sup>  | 149.10±1.71 <sup>abc</sup> | 113.85±2.14 <sup>d</sup> | 138.25±0.79 <sup>c</sup>  | 136.53±1.05 <sup>c</sup> | 154.34±1.73 <sup>ab</sup> | 12.64 |
|                               | ∑SFA         | 24.88±0.24 <sup>bcd</sup> | 24.76±0.33 <sup>bcd</sup>  | 26.51±3.03 <sup>b</sup>   | 24.13±1.26 <sup>bde</sup>  | 25.77±0.22 <sup>bv</sup>   | 18.96±0.26 <sup>f</sup>  | 23.79±0.06 <sup>de</sup>  | 22.94±0.22 <sup>e</sup>  | 29.28±0.57 <sup>a</sup>   | 1.93  |
|                               | ∑UFA         | 113.10±1.51 <sup>c</sup>  | 119.05±6.35 <sup>abc</sup> | 129.77±16.28 <sup>a</sup> | 118.48±6.26 <sup>bc</sup>  | 123.34±1.52 <sup>abc</sup> | 94.88±1.89 <sup>d</sup>  | 114.47±0.74 <sup>bc</sup> | 113.59±0.83 <sup>c</sup> | 125.06±1.30 <sup>ab</sup> | 10.79 |

∑SFA; sum of saturated fatty acids, ∑UFA; sum of unsaturated fatty acids.

**Table S3.** Fatty acid content of raw soybean flour packaged in polyethylene film and stored under high temperature conditions ( $\text{mg}\cdot\text{g}^{-1}$ , dry basis,  $p < 0.05$ ,  $n = 3$ ).

|                            |                          | Storage duration          |                          |                          |                          |                          |                          |                          |                          |                          | LSD  |
|----------------------------|--------------------------|---------------------------|--------------------------|--------------------------|--------------------------|--------------------------|--------------------------|--------------------------|--------------------------|--------------------------|------|
|                            |                          | Initial                   | 1W                       | 2W                       | 4W                       | 8W                       | 12W                      | 24W                      | 36W                      | 48W                      |      |
| High temperature<br>(45°C) | C6:0                     | 0.02±0.00 <sup>c</sup>    | 0.02±0.00 <sup>c</sup>   | 0.02±0.00 <sup>c</sup>   | 0.02±0.00 <sup>cd</sup>  | 0.04±0.01 <sup>a</sup>   | 0.02±0.00 <sup>d</sup>   | 0.03±0.01 <sup>d</sup>   | 0.02±0.00 <sup>cd</sup>  | 0.00±0.00 <sup>e</sup>   | 0.01 |
|                            | C14:0                    | 0.17±0.02 <sup>a</sup>    | 0.18±0.02 <sup>a</sup>   | 0.18±0.03 <sup>a</sup>   | 0.11±0.01 <sup>cd</sup>  | 0.13±0.01 <sup>bc</sup>  | 0.11±0.00 <sup>d</sup>   | 0.12±0.01 <sup>bcd</sup> | 0.13±0.01 <sup>bcd</sup> | 0.14±0.00 <sup>b</sup>   | 0.02 |
|                            | C16:0                    | 16.60±0.18 <sup>b</sup>   | 16.81±0.04 <sup>b</sup>  | 16.95±0.47 <sup>b</sup>  | 14.23±0.17 <sup>c</sup>  | 17.71±0.21 <sup>b</sup>  | 13.92±0.31 <sup>c</sup>  | 16.56±0.22 <sup>b</sup>  | 14.13±3.08 <sup>c</sup>  | 20.73±0.27 <sup>a</sup>  | 1.81 |
|                            | C16:1                    | 0.10±0.00 <sup>de</sup>   | 0.12±0.02 <sup>b</sup>   | 0.11±0.01 <sup>cd</sup>  | 0.09±0.00 <sup>e</sup>   | 0.10±0.01 <sup>de</sup>  | 0.09±0.00 <sup>e</sup>   | 0.10±0.00 <sup>de</sup>  | 0.12±0.01 <sup>bc</sup>  | 0.15±0.00 <sup>a</sup>   | 0.01 |
|                            | C17:0                    | 0.16±0.01 <sup>cd</sup>   | 0.17±0.00 <sup>bc</sup>  | 0.16±0.01 <sup>cd</sup>  | 0.15±0.00 <sup>e</sup>   | 0.18±0.00 <sup>b</sup>   | 0.16±0.01 <sup>cd</sup>  | 0.15±0.02 <sup>ed</sup>  | 0.16±0.00 <sup>ed</sup>  | 0.41±0.01 <sup>a</sup>   | 0.01 |
|                            | C18:0                    | 5.76±0.07 <sup>bc</sup>   | 5.81±0.02 <sup>b</sup>   | 5.65±0.15 <sup>bc</sup>  | 4.88±0.06 <sup>e</sup>   | 6.25±0.19 <sup>a</sup>   | 4.66±0.10 <sup>f</sup>   | 5.62±0.06 <sup>c</sup>   | 5.31±0.05 <sup>d</sup>   | 6.38±0.12 <sup>a</sup>   | 0.18 |
|                            | C18:1c&t                 | 35.96±0.41 <sup>bc</sup>  | 38.01±0.10 <sup>a</sup>  | 37.75±1.14 <sup>a</sup>  | 31.24±0.46 <sup>d</sup>  | 38.37±0.68 <sup>a</sup>  | 29.71±0.86 <sup>e</sup>  | 36.66±0.30 <sup>b</sup>  | 35.36±0.38 <sup>c</sup>  | 38.09±0.33 <sup>a</sup>  | 1.03 |
|                            | C18:2c&t                 | 64.36±0.94 <sup>cd</sup>  | 73.28±0.16 <sup>a</sup>  | 71.88±2.73 <sup>a</sup>  | 60.11±1.31 <sup>e</sup>  | 72.35±2.08 <sup>a</sup>  | 62.08±1.57 <sup>de</sup> | 67.75±1.20 <sup>b</sup>  | 66.79±1.00 <sup>bc</sup> | 70.98±0.92 <sup>a</sup>  | 2.57 |
|                            | C18:3n3                  | 12.07±0.19 <sup>b</sup>   | 12.72±0.01 <sup>a</sup>  | 12.07±0.54 <sup>b</sup>  | 10.24±0.25 <sup>e</sup>  | 12.09±0.45 <sup>b</sup>  | 11.00±0.29 <sup>d</sup>  | 11.90±0.33 <sup>bc</sup> | 11.37±0.18 <sup>cd</sup> | 11.63±0.28 <sup>bc</sup> | 0.54 |
|                            | C20:0                    | 0.63±0.01 <sup>b</sup>    | 0.63±0.01 <sup>b</sup>   | 0.64±0.02 <sup>ab</sup>  | 0.53±0.01 <sup>d</sup>   | 0.65±0.01 <sup>ab</sup>  | 0.48±0.01 <sup>e</sup>   | 0.58±0.01 <sup>c</sup>   | 0.65±0.04 <sup>ab</sup>  | 0.67±0.01 <sup>a</sup>   | 0.03 |
|                            | C20:1n9                  | 0.52±0.04 <sup>ab</sup>   | 0.52±0.03 <sup>ab</sup>  | 0.53±0.03 <sup>ab</sup>  | 0.45±0.01 <sup>c</sup>   | 0.57±0.05 <sup>a</sup>   | 0.33±0.02 <sup>d</sup>   | 0.49±0.02 <sup>bc</sup>  | 0.35±0.04 <sup>d</sup>   | 0.34±0.05 <sup>d</sup>   | 0.06 |
|                            | C20:2                    | 0.06±0.01 <sup>bc</sup>   | 0.07±0.01 <sup>a</sup>   | 0.06±0.01 <sup>ab</sup>  | 0.05±0.00 <sup>c</sup>   | 0.06±0.01 <sup>ab</sup>  | 0.06±0.01 <sup>bc</sup>  | 0.06±0.00 <sup>abc</sup> | 0.06±0.00 <sup>abc</sup> | 0.07±0.00 <sup>ab</sup>  | 0.01 |
|                            | C20:3n6&21:0             | 0.08±0.01 <sup>cd</sup>   | 0.09±0.01 <sup>a</sup>   | 0.09±0.01 <sup>ab</sup>  | 0.07±0.01 <sup>de</sup>  | 0.08±0.00 <sup>abc</sup> | 0.06±0.00 <sup>e</sup>   | 0.08±0.00 <sup>c</sup>   | 0.08±0.00 <sup>bc</sup>  | 0.09±0.00 <sup>a</sup>   | 0.01 |
|                            | C22:0                    | 1.02±0.02 <sup>b</sup>    | 1.03±0.01 <sup>b</sup>   | 1.02±0.04 <sup>b</sup>   | 0.83±0.01 <sup>d</sup>   | 1.02±0.02 <sup>b</sup>   | 0.77±0.02 <sup>e</sup>   | 0.97±0.01 <sup>c</sup>   | 0.99±0.03 <sup>bc</sup>  | 1.26±0.03 <sup>a</sup>   | 0.04 |
|                            | C22:1n9                  | 0.03±0.01 <sup>e</sup>    | 0.06±0.01 <sup>d</sup>   | 0.06±0.01 <sup>d</sup>   | 0.05±0.00 <sup>de</sup>  | 0.07±0.01 <sup>d</sup>   | 0.12±0.04 <sup>c</sup>   | 0.07±0.00 <sup>d</sup>   | 0.15±0.02 <sup>b</sup>   | 0.21±0.02 <sup>a</sup>   | 0.03 |
|                            | C23:0                    | 0.13±0.01 <sup>b</sup>    | 0.13±0.00 <sup>bc</sup>  | 0.12±0.01 <sup>bc</sup>  | 0.10±0.00 <sup>c</sup>   | 0.12±0.01 <sup>bc</sup>  | 0.21±0.06 <sup>a</sup>   | 0.12±0.00 <sup>bc</sup>  | 0.12±0.01 <sup>bc</sup>  | 0.15±0.01 <sup>b</sup>   | 0.03 |
|                            | C24:0                    | 0.29±0.01 <sup>c</sup>    | 0.32±0.00 <sup>b</sup>   | 0.31±0.01 <sup>bc</sup>  | 0.24±0.01 <sup>d</sup>   | 0.31±0.01 <sup>bc</sup>  | 0.24±0.00 <sup>d</sup>   | 0.37±0.01 <sup>a</sup>   | 0.30±0.01 <sup>c</sup>   | 0.32±0.01 <sup>b</sup>   | 0.02 |
|                            | Total                    | 137.98±1.75 <sup>bc</sup> | 149.99±0.39 <sup>a</sup> | 147.61±5.08 <sup>a</sup> | 123.39±2.26 <sup>d</sup> | 150.11±3.32 <sup>a</sup> | 124.01±3.18 <sup>d</sup> | 141.64±2.02 <sup>b</sup> | 136.08±4.63 <sup>c</sup> | 151.62±1.90 <sup>a</sup> | 5.25 |
|                            | ∑SFA                     | 24.88±0.24 <sup>b</sup>   | 25.20±0.08 <sup>b</sup>  | 25.14±0.71 <sup>b</sup>  | 21.15±0.24 <sup>c</sup>  | 26.50±0.37 <sup>b</sup>  | 20.62±0.42 <sup>c</sup>  | 24.61±0.31 <sup>b</sup>  | 21.88±3.12 <sup>c</sup>  | 30.15±0.44 <sup>a</sup>  | 1.90 |
| ∑UFA                       | 113.10±1.51 <sup>b</sup> | 124.79±0.31 <sup>a</sup>  | 122.47±4.40 <sup>a</sup> | 102.24±2.02 <sup>c</sup> | 123.62±3.14 <sup>a</sup> | 103.39±2.76 <sup>c</sup> | 117.03±1.76 <sup>b</sup> | 114.20±1.53 <sup>b</sup> | 121.46±1.47 <sup>a</sup> | 4.08                     |      |

∑SFA; sum of saturated fatty acids, ∑UFA; sum of unsaturated fatty acids.

**Table S4.** Fatty acid content of roasted soybean flour packaged in polyethylene film and stored under refrigerated conditions ( $\text{mg}\cdot\text{g}^{-1}$ , dry basis,  $p < 0.05$ ,  $n = 3$ ).

|                        | Initial                    | Storage duration           |                             |                            |                            |                           |                            |                            |                            | LSD                      |       |
|------------------------|----------------------------|----------------------------|-----------------------------|----------------------------|----------------------------|---------------------------|----------------------------|----------------------------|----------------------------|--------------------------|-------|
|                        |                            | 1W                         | 2W                          | 4W                         | 8W                         | 12W                       | 24W                        | 36W                        | 48W                        |                          |       |
| C6:0                   | 0.04±0.00 <sup>bc</sup>    | 0.05±0.02 <sup>a</sup>     | 0.04±0.01 <sup>bc</sup>     | 0.04±0.01 <sup>b</sup>     | 0.03±0.00 <sup>c</sup>     | 0.02±0.00 <sup>d</sup>    | 0.03±0.00 <sup>c</sup>     | 0.00±0.00 <sup>e</sup>     | 0.00±0.00 <sup>e</sup>     | 0.01                     |       |
| C14:0                  | 0.19±0.02 <sup>b</sup>     | 0.24±0.02 <sup>a</sup>     | 0.18±0.03 <sup>b</sup>      | 0.11±0.02 <sup>c</sup>     | 0.12±0.01 <sup>c</sup>     | 0.11±0.02 <sup>c</sup>    | 0.13±0.00 <sup>c</sup>     | 0.12±0.00 <sup>c</sup>     | 0.13±0.00 <sup>c</sup>     | 0.03                     |       |
| C16:0                  | 16.36±0.21 <sup>b</sup>    | 16.85±0.15 <sup>b</sup>    | 15.48±3.47 <sup>bc</sup>    | 15.33±2.11 <sup>bc</sup>   | 17.11±0.19 <sup>b</sup>    | 13.89±0.45 <sup>c</sup>   | 16.36±0.05 <sup>b</sup>    | 16.03±0.18 <sup>bc</sup>   | 20.74±0.20 <sup>a</sup>    | 2.35                     |       |
| C16:1                  | 0.10±0.00 <sup>bc</sup>    | 0.10±0.00 <sup>bc</sup>    | 0.09±0.02 <sup>c</sup>      | 0.10±0.01 <sup>bc</sup>    | 0.11±0.00 <sup>bc</sup>    | 0.09±0.00 <sup>c</sup>    | 0.10±0.00 <sup>bc</sup>    | 0.12±0.01 <sup>ab</sup>    | 0.13±0.02 <sup>a</sup>     | 0.02                     |       |
| C17:0                  | 0.16±0.01 <sup>bcd</sup>   | 0.17±0.00 <sup>bc</sup>    | 0.15±0.03 <sup>d</sup>      | 0.16±0.02 <sup>bcd</sup>   | 0.18±0.00 <sup>b</sup>     | 0.15±0.01 <sup>cd</sup>   | 0.17±0.00 <sup>bcd</sup>   | 0.16±0.00 <sup>bcd</sup>   | 0.38±0.01 <sup>a</sup>     | 0.02                     |       |
| C18:0                  | 5.63±0.07 <sup>abc</sup>   | 5.73±0.05 <sup>abc</sup>   | 5.16±1.16 <sup>cd</sup>     | 5.33±0.77 <sup>bcd</sup>   | 6.00±0.09 <sup>ab</sup>    | 4.65±0.13 <sup>d</sup>    | 5.48±0.03 <sup>abc</sup>   | 5.32±0.05 <sup>bcd</sup>   | 6.25±0.08 <sup>a</sup>     | 0.81                     |       |
| C18:1c&t               | 35.33±0.47 <sup>ab</sup>   | 36.48±0.58 <sup>ab</sup>   | 34.23±7.89 <sup>bc</sup>    | 33.58±4.55 <sup>bc</sup>   | 37.69±0.46 <sup>ab</sup>   | 29.51±1.09 <sup>c</sup>   | 35.74±0.31 <sup>ab</sup>   | 35.55±0.48 <sup>ab</sup>   | 39.54±0.13 <sup>a</sup>    | 5.28                     |       |
| C18:2c&t               | 63.13±0.83 <sup>b</sup>    | 65.22±3.68 <sup>ab</sup>   | 65.03±16.02 <sup>ab</sup>   | 65.29±9.21 <sup>ab</sup>   | 72.89±0.88 <sup>ab</sup>   | 62.33±2.15 <sup>b</sup>   | 67.36±1.27 <sup>ab</sup>   | 67.90±1.21 <sup>ab</sup>   | 75.52±0.30 <sup>a</sup>    | 10.91                    |       |
| C18:3n3                | 11.89±0.16 <sup>ab</sup>   | 10.91±0.81 <sup>b</sup>    | 10.90±2.80 <sup>b</sup>     | 11.27±1.65 <sup>b</sup>    | 12.49±0.16 <sup>ab</sup>   | 11.28±0.38 <sup>b</sup>   | 12.26±0.36 <sup>ab</sup>   | 12.17±0.26 <sup>ab</sup>   | 13.32±0.10 <sup>a</sup>    | 1.95                     |       |
| Refrigeration<br>(4°C) | C20:0                      | 0.61±0.00 <sup>ab</sup>    | 0.61±0.00 <sup>ab</sup>     | 0.60±0.14 <sup>ab</sup>    | 0.57±0.07 <sup>b</sup>     | 0.64±0.01 <sup>ab</sup>   | 0.47±0.02 <sup>c</sup>     | 0.56±0.00 <sup>bc</sup>    | 0.69±0.01 <sup>a</sup>     | 0.64±0.01 <sup>ab</sup>  | 0.09  |
|                        | C20:1n9                    | 0.51±0.03 <sup>b</sup>     | 0.63±0.04 <sup>bc</sup>     | 0.48±0.07 <sup>bc</sup>    | 0.44±0.04 <sup>c</sup>     | 0.51±0.03 <sup>b</sup>    | 0.34±0.01 <sup>d</sup>     | 0.49±0.03 <sup>bc</sup>    | 0.37±0.01 <sup>d</sup>     | 0.35±0.01 <sup>d</sup>   | 0.06  |
|                        | C20:2                      | 0.05±0.01 <sup>b</sup>     | 0.05±0.01 <sup>b</sup>      | 0.05±0.01 <sup>ab</sup>    | 0.06±0.00 <sup>ab</sup>    | 0.06±0.01 <sup>a</sup>    | 0.05±0.00 <sup>ab</sup>    | 0.06±0.01 <sup>ab</sup>    | 0.06±0.00 <sup>ab</sup>    | 0.07±0.00 <sup>a</sup>   | 0.01  |
|                        | C20:3n6&21:0               | 0.08±0.01 <sup>bc</sup>    | 0.10±0.03 <sup>bc</sup>     | 0.08±0.01 <sup>bc</sup>    | 0.07±0.01 <sup>bc</sup>    | 0.08±0.01 <sup>bc</sup>   | 0.07±0.00 <sup>c</sup>     | 0.08±0.00 <sup>bc</sup>    | 0.08±0.00 <sup>bc</sup>    | 0.09±0.00 <sup>ab</sup>  | 0.02  |
|                        | C22:0                      | 0.99±0.01 <sup>ab</sup>    | 0.99±0.01 <sup>b</sup>      | 0.94±0.22 <sup>b</sup>     | 0.87±0.11 <sup>bc</sup>    | 1.01±0.02 <sup>ab</sup>   | 0.75±0.04 <sup>c</sup>     | 0.94±0.01 <sup>b</sup>     | 0.91±0.01 <sup>b</sup>     | 1.13±0.02 <sup>a</sup>   | 0.14  |
|                        | C22:1n9                    | 0.05±0.01 <sup>b</sup>     | 0.05±0.02 <sup>b</sup>      | 0.06±0.01 <sup>b</sup>     | 0.05±0.01 <sup>b</sup>     | 0.05±0.01 <sup>b</sup>    | 0.08±0.00 <sup>a</sup>     | 0.05±0.01 <sup>b</sup>     | 0.00±0.00 <sup>c</sup>     | 0.05±0.00 <sup>b</sup>   | 0.02  |
|                        | C23:0                      | 0.12±0.00 <sup>b</sup>     | 0.12±0.00 <sup>b</sup>      | 0.12±0.03 <sup>b</sup>     | 0.11±0.03 <sup>b</sup>     | 0.13±0.01 <sup>b</sup>    | 0.26±0.05 <sup>a</sup>     | 0.12±0.00 <sup>b</sup>     | 0.12±0.00 <sup>b</sup>     | 0.14±0.00 <sup>b</sup>   | 0.04  |
|                        | C24:0                      | 0.29±0.01 <sup>b</sup>     | 0.29±0.00 <sup>b</sup>      | 0.28±0.06 <sup>bc</sup>    | 0.25±0.03 <sup>c</sup>     | 0.29±0.01 <sup>bc</sup>   | 0.25±0.01 <sup>c</sup>     | 0.36±0.00 <sup>a</sup>     | 0.27±0.00 <sup>bc</sup>    | 0.29±0.00 <sup>b</sup>   | 0.04  |
|                        | Total                      | 135.56±1.77 <sup>bc</sup>  | 138.60±4.93 <sup>abc</sup>  | 133.87±31.95 <sup>bc</sup> | 133.64±18.64 <sup>bc</sup> | 149.39±1.60 <sup>ab</sup> | 124.31±4.24 <sup>c</sup>   | 140.29±1.99 <sup>abc</sup> | 139.87±2.20 <sup>abc</sup> | 158.76±0.72 <sup>a</sup> | 21.59 |
|                        | ∑SFA                       | 24.48±0.30 <sup>b</sup>    | 25.16±0.23 <sup>b</sup>     | 23.01±5.14 <sup>bc</sup>   | 22.85±3.17 <sup>bc</sup>   | 25.58±0.15 <sup>b</sup>   | 20.62±0.62 <sup>c</sup>    | 24.22±0.09 <sup>b</sup>    | 23.70±0.24 <sup>bc</sup>   | 29.79±0.31 <sup>a</sup>  | 3.49  |
| ∑UFA                   | 111.08±1.47 <sup>abc</sup> | 113.44±5.01 <sup>abc</sup> | 110.85±26.81 <sup>abc</sup> | 110.80±15.47 <sup>bc</sup> | 123.81±1.50 <sup>ab</sup>  | 103.69±3.62 <sup>c</sup>  | 116.06±1.91 <sup>abc</sup> | 116.17±1.96 <sup>abc</sup> | 128.97±0.45 <sup>a</sup>   | 18.16                    |       |

∑SFA; sum of saturated fatty acids, ∑UFA; sum of unsaturated fatty acids.

**Table S5.** Fatty acid content of roasted soybean flour packaged in polyethylene film and stored under room temperature conditions ( $\text{mg}\cdot\text{g}^{-1}$ , dry basis,  $p < 0.05$ ,  $n = 3$ ).

|                               |                            | Storage duration          |                            |                            |                            |                           |                           |                            |                            |                          | LSD   |
|-------------------------------|----------------------------|---------------------------|----------------------------|----------------------------|----------------------------|---------------------------|---------------------------|----------------------------|----------------------------|--------------------------|-------|
|                               |                            | Initial                   | 1W                         | 2W                         | 4W                         | 8W                        | 12W                       | 24W                        | 36W                        | 48W                      |       |
| Room<br>temperature<br>(20°C) | C6:0                       | 0.04±0.00 <sup>a</sup>    | 0.03±0.02 <sup>ab</sup>    | 0.04±0.00 <sup>a</sup>     | 0.04±0.01 <sup>a</sup>     | 0.03±0.00 <sup>ab</sup>   | 0.02±0.00 <sup>b</sup>    | 0.03±0.00 <sup>ab</sup>    | 0.00±0.00 <sup>c</sup>     | 0.00±0.00 <sup>c</sup>   | 0.02  |
|                               | C14:0                      | 0.19±0.02 <sup>b</sup>    | 0.23±0.02 <sup>a</sup>     | 0.19±0.00 <sup>b</sup>     | 0.11±0.02 <sup>cd</sup>    | 0.12±0.00 <sup>c</sup>    | 0.10±0.00 <sup>d</sup>    | 0.12±0.00 <sup>c</sup>     | 0.12±0.01 <sup>cd</sup>    | 0.13±0.00 <sup>c</sup>   | 0.02  |
|                               | C16:0                      | 16.36±0.21 <sup>bc</sup>  | 16.81±0.09 <sup>b</sup>    | 16.71±0.08 <sup>b</sup>    | 14.47±3.54 <sup>cd</sup>   | 16.99±0.07 <sup>b</sup>   | 13.14±0.26 <sup>d</sup>   | 16.28±0.02 <sup>bc</sup>   | 15.90±0.10 <sup>bc</sup>   | 20.39±0.14 <sup>a</sup>  | 2.04  |
|                               | C16:1                      | 0.10±0.00 <sup>bcd</sup>  | 0.10±0.00 <sup>bcd</sup>   | 0.10±0.01 <sup>bcd</sup>   | 0.09±0.02 <sup>cd</sup>    | 0.12±0.02 <sup>ab</sup>   | 0.08±0.00 <sup>d</sup>    | 0.10±0.00 <sup>bcd</sup>   | 0.12±0.02 <sup>abc</sup>   | 0.14±0.02 <sup>a</sup>   | 0.02  |
|                               | C17:0                      | 0.16±0.01 <sup>bc</sup>   | 0.17±0.00 <sup>b</sup>     | 0.16±0.01 <sup>bc</sup>    | 0.15±0.03 <sup>c</sup>     | 0.18±0.00 <sup>b</sup>    | 0.14±0.01 <sup>c</sup>    | 0.17±0.00 <sup>bc</sup>    | 0.16±0.00 <sup>bc</sup>    | 0.36±0.01 <sup>a</sup>   | 0.02  |
|                               | C18:0                      | 5.63±0.07 <sup>abc</sup>  | 5.72±0.04 <sup>ab</sup>    | 5.55±0.01 <sup>abc</sup>   | 4.96±1.21 <sup>cd</sup>    | 5.93±0.15 <sup>ab</sup>   | 4.38±0.12 <sup>d</sup>    | 5.45±0.01 <sup>bc</sup>    | 5.29±0.05 <sup>bc</sup>    | 6.18±0.04 <sup>a</sup>   | 0.70  |
|                               | C18:1c&t                   | 35.33±0.47 <sup>ab</sup>  | 37.12±0.11 <sup>a</sup>    | 36.94±0.15 <sup>a</sup>    | 31.91±8.14 <sup>bc</sup>   | 37.32±0.16 <sup>a</sup>   | 27.73±0.72 <sup>c</sup>   | 35.63±0.03 <sup>ab</sup>   | 35.28±0.31 <sup>ab</sup>   | 38.65±0.57 <sup>a</sup>  | 4.70  |
|                               | C18:2c&t                   | 63.13±0.83 <sup>bcd</sup> | 69.76±0.81 <sup>abc</sup>  | 70.66±0.12 <sup>abc</sup>  | 62.03±16.00 <sup>cd</sup>  | 72.21±0.36 <sup>ab</sup>  | 58.48±1.56 <sup>d</sup>   | 67.38±0.23 <sup>abcd</sup> | 67.27±0.72 <sup>abcd</sup> | 73.47±1.47 <sup>a</sup>  | 9.27  |
|                               | C18:3n3                    | 11.89±0.16 <sup>abc</sup> | 11.94±0.23 <sup>abc</sup>  | 11.92±0.06 <sup>abc</sup>  | 10.73±2.85 <sup>bc</sup>   | 12.35±0.06 <sup>ab</sup>  | 10.58±0.31 <sup>c</sup>   | 12.34±0.11 <sup>ab</sup>   | 12.03±0.14 <sup>abc</sup>  | 12.95±0.35 <sup>a</sup>  | 1.66  |
|                               | C20:0                      | 0.61±0.00 <sup>ab</sup>   | 0.62±0.01 <sup>ab</sup>    | 0.63±0.00 <sup>ab</sup>    | 0.53±0.13 <sup>c</sup>     | 0.62±0.01 <sup>ab</sup>   | 0.44±0.02 <sup>d</sup>    | 0.56±0.00 <sup>bc</sup>    | 0.68±0.01 <sup>a</sup>     | 0.61±0.01 <sup>b</sup>   | 0.08  |
|                               | C20:1n9                    | 0.51±0.03 <sup>b</sup>    | 0.59±0.01 <sup>a</sup>     | 0.50±0.02 <sup>b</sup>     | 0.41±0.08 <sup>cd</sup>    | 0.51±0.01 <sup>b</sup>    | 0.31±0.03 <sup>e</sup>    | 0.47±0.01 <sup>bc</sup>    | 0.37±0.00 <sup>de</sup>    | 0.32±0.02 <sup>e</sup>   | 0.06  |
|                               | C20:2                      | 0.05±0.01 <sup>c</sup>    | 0.07±0.01 <sup>a</sup>     | 0.06±0.01 <sup>ab</sup>    | 0.05±0.02 <sup>bc</sup>    | 0.06±0.00 <sup>abc</sup>  | 0.05±0.00 <sup>bc</sup>   | 0.06±0.00 <sup>abc</sup>   | 0.06±0.00 <sup>abc</sup>   | 0.06±0.00 <sup>ab</sup>  | 0.01  |
|                               | C20:3n6&21:0               | 0.08±0.01 <sup>cd</sup>   | 0.10±0.00 <sup>a</sup>     | 0.08±0.02 <sup>bc</sup>    | 0.07±0.01 <sup>cd</sup>    | 0.08±0.00 <sup>abc</sup>  | 0.06±0.01 <sup>d</sup>    | 0.07±0.00 <sup>cd</sup>    | 0.08±0.00 <sup>bc</sup>    | 0.09±0.01 <sup>ab</sup>  | 0.02  |
|                               | C22:0                      | 0.99±0.01 <sup>b</sup>    | 0.99±0.01 <sup>b</sup>     | 1.02±0.01 <sup>ab</sup>    | 0.84±0.20 <sup>c</sup>     | 0.98±0.01 <sup>b</sup>    | 0.71±0.00 <sup>d</sup>    | 0.94±0.00 <sup>bc</sup>    | 0.91±0.02 <sup>bc</sup>    | 1.14±0.01 <sup>a</sup>   | 0.12  |
|                               | C22:1n9                    | 0.05±0.01 <sup>bc</sup>   | 0.06±0.01 <sup>bc</sup>    | 0.06±0.01 <sup>b</sup>     | 0.05±0.01 <sup>bc</sup>    | 0.05±0.01 <sup>bc</sup>   | 0.09±0.02 <sup>a</sup>    | 0.07±0.00 <sup>b</sup>     | 0.00±0.00 <sup>d</sup>     | 0.04±0.01 <sup>c</sup>   | 0.01  |
|                               | C23:0                      | 0.12±0.00 <sup>bc</sup>   | 0.13±0.01 <sup>bc</sup>    | 0.13±0.01 <sup>bc</sup>    | 0.10±0.02 <sup>c</sup>     | 0.13±0.00 <sup>bc</sup>   | 0.26±0.04 <sup>a</sup>    | 0.12±0.00 <sup>c</sup>     | 0.11±0.00 <sup>c</sup>     | 0.15±0.02 <sup>b</sup>   | 0.03  |
|                               | C24:0                      | 0.29±0.01 <sup>bc</sup>   | 0.29±0.01 <sup>bc</sup>    | 0.30±0.01 <sup>b</sup>     | 0.24±0.06 <sup>de</sup>    | 0.30±0.01 <sup>b</sup>    | 0.22±0.01 <sup>e</sup>    | 0.36±0.01 <sup>a</sup>     | 0.26±0.01 <sup>cd</sup>    | 0.29±0.00 <sup>bc</sup>  | 0.04  |
|                               | Total                      | 135.56±1.77 <sup>bc</sup> | 144.72±0.79 <sup>abc</sup> | 145.06±0.24 <sup>abc</sup> | 126.79±32.37 <sup>cd</sup> | 147.99±0.70 <sup>ab</sup> | 116.80±3.04 <sup>d</sup>  | 140.15±0.31 <sup>abc</sup> | 138.63±1.31 <sup>abc</sup> | 154.98±2.50 <sup>a</sup> | 18.70 |
|                               | ∑SFA                       | 24.48±0.30 <sup>bc</sup>  | 25.08±0.17 <sup>b</sup>    | 24.81±0.10 <sup>b</sup>    | 21.50±5.25 <sup>cd</sup>   | 25.37±0.23 <sup>b</sup>   | 19.47±0.44 <sup>d</sup>   | 24.10±0.01 <sup>bc</sup>   | 23.51±0.16 <sup>bc</sup>   | 29.34±0.22 <sup>a</sup>  | 3.02  |
| ∑UFA                          | 111.08±1.47 <sup>abc</sup> | 119.64±0.97 <sup>ab</sup> | 120.24±0.17 <sup>ab</sup>  | 105.29±27.12 <sup>bc</sup> | 122.63±0.59 <sup>a</sup>   | 97.32±2.60 <sup>c</sup>   | 116.05±0.32 <sup>ab</sup> | 115.12±1.15 <sup>ab</sup>  | 125.64±2.40 <sup>a</sup>   | 15.69                    |       |

∑SFA; sum of saturated fatty acids, ∑UFA; sum of unsaturated fatty acids.

**Table S6.** Fatty acid content of roasted soybean flour packaged in polyethylene film and stored under high temperature conditions ( $\text{mg}\cdot\text{g}^{-1}$ , dry basis,  $p < 0.05$ ,  $n = 3$ ).

|                            |                          | Storage duration          |                           |                           |                           |                          |                          |                          |                          |                          | LSD  |
|----------------------------|--------------------------|---------------------------|---------------------------|---------------------------|---------------------------|--------------------------|--------------------------|--------------------------|--------------------------|--------------------------|------|
|                            |                          | Initial                   | 1W                        | 2W                        | 4W                        | 8W                       | 12W                      | 24W                      | 36W                      | 48W                      |      |
| High temperature<br>(45°C) | C6:0                     | 0.04±0.00 <sup>b</sup>    | 0.04±0.01 <sup>b</sup>    | 0.04±0.00 <sup>b</sup>    | 0.04±0.00 <sup>b</sup>    | 0.03±0.00 <sup>b</sup>   | 0.02±0.00 <sup>b</sup>   | 1.09±0.24 <sup>a</sup>   | 0.00±0.00 <sup>b</sup>   | 0.00±0.00 <sup>b</sup>   | 0.14 |
|                            | C14:0                    | 0.19±0.02 <sup>c</sup>    | 0.21±0.03 <sup>c</sup>    | 0.19±0.02 <sup>c</sup>    | 0.12±0.01 <sup>de</sup>   | 0.13±0.02 <sup>d</sup>   | 0.10±0.00 <sup>e</sup>   | 0.12±0.01 <sup>de</sup>  | 0.42±0.00 <sup>b</sup>   | 0.48±0.01 <sup>a</sup>   | 0.03 |
|                            | C16:0                    | 16.36±0.21 <sup>cd</sup>  | 17.66±1.26 <sup>ab</sup>  | 17.48±0.28 <sup>b</sup>   | 17.06±0.68 <sup>bc</sup>  | 17.42±0.03 <sup>b</sup>  | 14.30±0.04 <sup>e</sup>  | 16.01±0.05 <sup>d</sup>  | 14.83±0.38 <sup>e</sup>  | 18.49±0.13 <sup>a</sup>  | 0.87 |
|                            | C16:1                    | 0.10±0.00 <sup>c</sup>    | 0.11±0.01 <sup>bc</sup>   | 0.11±0.01 <sup>bc</sup>   | 0.11±0.00 <sup>bc</sup>   | 0.11±0.01 <sup>bc</sup>  | 0.09±0.00 <sup>c</sup>   | 0.17±0.03 <sup>a</sup>   | 0.12±0.01 <sup>b</sup>   | 0.10±0.00 <sup>c</sup>   | 0.02 |
|                            | C17:0                    | 0.16±0.01 <sup>cdef</sup> | 0.18±0.02 <sup>bc</sup>   | 0.17±0.00 <sup>bcde</sup> | 0.17±0.01 <sup>bcd</sup>  | 0.18±0.00 <sup>b</sup>   | 0.16±0.00 <sup>ef</sup>  | 0.16±0.00 <sup>def</sup> | 0.15±0.00 <sup>f</sup>   | 0.34±0.01 <sup>a</sup>   | 0.01 |
|                            | C18:0                    | 5.63±0.07 <sup>bcd</sup>  | 6.02±0.42 <sup>a</sup>    | 5.82±0.08 <sup>abc</sup>  | 5.96±0.45 <sup>ab</sup>   | 6.12±0.20 <sup>a</sup>   | 4.85±0.00 <sup>e</sup>   | 5.36±0.02 <sup>d</sup>   | 4.87±0.14 <sup>e</sup>   | 5.51±0.04 <sup>cd</sup>  | 0.38 |
|                            | C18:1c&t                 | 35.33±0.47 <sup>b</sup>   | 39.32±2.95 <sup>a</sup>   | 38.60±0.60 <sup>a</sup>   | 37.36±1.58 <sup>ab</sup>  | 38.25±0.18 <sup>a</sup>  | 30.40±0.30 <sup>c</sup>  | 26.24±0.35 <sup>d</sup>  | 22.88±0.82 <sup>e</sup>  | 24.72±0.33 <sup>de</sup> | 2.05 |
|                            | C18:2c&t                 | 63.13±0.83 <sup>b</sup>   | 75.24±6.52 <sup>a</sup>   | 73.33±1.33 <sup>a</sup>   | 71.83±3.17 <sup>a</sup>   | 73.92±0.45 <sup>a</sup>  | 61.92±0.10 <sup>b</sup>  | 6.07±0.60 <sup>c</sup>   | 3.60±0.15 <sup>c</sup>   | 3.56±0.11 <sup>c</sup>   | 4.27 |
|                            | C18:3n3                  | 11.89±0.16 <sup>b</sup>   | 13.05±1.24 <sup>a</sup>   | 12.30±0.26 <sup>ab</sup>  | 12.25±0.58 <sup>ab</sup>  | 12.56±0.10 <sup>ab</sup> | 10.74±0.09 <sup>c</sup>  | 0.49±0.03 <sup>d</sup>   | 0.25±0.02 <sup>d</sup>   | 0.27±0.01 <sup>d</sup>   | 0.81 |
|                            | C20:0                    | 0.61±0.00 <sup>c</sup>    | 0.65±0.05 <sup>abc</sup>  | 0.67±0.02 <sup>a</sup>    | 0.63±0.04 <sup>bc</sup>   | 0.64±0.00 <sup>abc</sup> | 0.48±0.00 <sup>e</sup>   | 0.56±0.01 <sup>d</sup>   | 0.57±0.01 <sup>d</sup>   | 0.66±0.00 <sup>ab</sup>  | 0.04 |
|                            | C20:1n9                  | 0.51±0.03 <sup>bc</sup>   | 0.57±0.08 <sup>b</sup>    | 0.55±0.02 <sup>b</sup>    | 0.53±0.01 <sup>b</sup>    | 0.50±0.00 <sup>bc</sup>  | 0.34±0.01 <sup>cd</sup>  | 1.25±0.29 <sup>a</sup>   | 0.25±0.02 <sup>d</sup>   | 0.31±0.00 <sup>d</sup>   | 0.17 |
|                            | C20:2                    | 0.05±0.01 <sup>b</sup>    | 0.07±0.01 <sup>a</sup>    | 0.06±0.01 <sup>ab</sup>   | 0.06±0.00 <sup>ab</sup>   | 0.06±0.01 <sup>ab</sup>  | 0.06±0.00 <sup>b</sup>   | 0.00±0.00 <sup>c</sup>   | 0.00±0.00 <sup>c</sup>   | 0.00±0.00 <sup>c</sup>   | 0.01 |
|                            | C20:3n6&21:0             | 0.08±0.01 <sup>cde</sup>  | 0.10±0.01 <sup>b</sup>    | 0.09±0.00 <sup>bc</sup>   | 0.09±0.01 <sup>bc</sup>   | 0.08±0.00 <sup>cd</sup>  | 0.07±0.00 <sup>e</sup>   | 0.07±0.00 <sup>de</sup>  | 0.14±0.00 <sup>a</sup>   | 0.14±0.00 <sup>a</sup>   | 0.01 |
|                            | C22:0                    | 0.99±0.01 <sup>c</sup>    | 1.05±0.07 <sup>bc</sup>   | 1.06±0.01 <sup>b</sup>    | 1.00±0.04 <sup>c</sup>    | 1.01±0.01 <sup>bc</sup>  | 0.79±0.00 <sup>e</sup>   | 0.91±0.02 <sup>d</sup>   | 0.93±0.06 <sup>d</sup>   | 1.17±0.03 <sup>a</sup>   | 0.06 |
|                            | C22:1n9                  | 0.05±0.01 <sup>bc</sup>   | 0.06±0.01 <sup>abc</sup>  | 0.07±0.01 <sup>abc</sup>  | 0.06±0.01 <sup>abc</sup>  | 0.22±0.27 <sup>a</sup>   | 0.14±0.03 <sup>abc</sup> | 0.11±0.04 <sup>abc</sup> | 0.00±0.00 <sup>c</sup>   | 0.20±0.09 <sup>ab</sup>  | 0.17 |
|                            | C23:0                    | 0.12±0.00 <sup>bc</sup>   | 0.13±0.01 <sup>bc</sup>   | 0.13±0.00 <sup>bc</sup>   | 0.12±0.01 <sup>bc</sup>   | 0.12±0.01 <sup>bc</sup>  | 0.17±0.06 <sup>a</sup>   | 0.10±0.00 <sup>c</sup>   | 0.13±0.01 <sup>bc</sup>  | 0.14±0.01 <sup>b</sup>   | 0.03 |
|                            | C24:0                    | 0.29±0.01 <sup>bc</sup>   | 0.31±0.02 <sup>bc</sup>   | 0.32±0.01 <sup>b</sup>    | 0.29±0.02 <sup>c</sup>    | 0.30±0.00 <sup>bc</sup>  | 0.25±0.01 <sup>d</sup>   | 0.36±0.01 <sup>a</sup>   | 0.29±0.03 <sup>bc</sup>  | 0.39±0.02 <sup>a</sup>   | 0.03 |
|                            | Total                    | 135.56±1.77 <sup>b</sup>  | 154.76±12.49 <sup>a</sup> | 150.96±2.59 <sup>a</sup>  | 147.67±6.56 <sup>a</sup>  | 151.66±0.40 <sup>a</sup> | 124.91±0.41 <sup>c</sup> | 59.08±0.78 <sup>d</sup>  | 49.43±1.63 <sup>e</sup>  | 56.48±0.73 <sup>de</sup> | 8.34 |
| ∑SFA                       | 24.48±0.30 <sup>d</sup>  | 26.34±1.88 <sup>ab</sup>  | 25.96±0.41 <sup>abc</sup> | 25.48±1.23 <sup>bcd</sup> | 26.03±0.24 <sup>abc</sup> | 21.20±0.03 <sup>e</sup>  | 24.75±0.19 <sup>cd</sup> | 22.32±0.61 <sup>e</sup>  | 27.32±0.19 <sup>a</sup>  | 1.37                     |      |
| ∑UFA                       | 111.08±1.47 <sup>b</sup> | 128.42±10.68 <sup>a</sup> | 125.00±2.19 <sup>a</sup>  | 122.20±5.34 <sup>a</sup>  | 125.63±0.51 <sup>a</sup>  | 103.71±0.39 <sup>c</sup> | 34.33±0.81 <sup>d</sup>  | 27.11±1.02 <sup>e</sup>  | 29.16±0.54 <sup>de</sup> | 7.05                     |      |

∑SFA; sum of saturated fatty acids, ∑UFA; sum of unsaturated fatty acids.

**Table S7.** Fatty acid content of raw soybean flour packaged in polypropylene film and stored under refrigerated conditions ( $\text{mg}\cdot\text{g}^{-1}$ , dry basis,  $p < 0.05$ ,  $n = 3$ ).

|                        |              | Storage duration          |                            |                           |                           |                            |                          |                          |                           |                           | LSD    |
|------------------------|--------------|---------------------------|----------------------------|---------------------------|---------------------------|----------------------------|--------------------------|--------------------------|---------------------------|---------------------------|--------|
|                        |              | Initial                   | 1W                         | 2W                        | 4W                        | 8W                         | 12W                      | 24W                      | 36W                       | 48W                       |        |
| Refrigeration<br>(4°C) | C6:0         | 0.02±0.00 <sup>ab</sup>   | 0.03±0.01 <sup>ab</sup>    | 0.02±0.01 <sup>ab</sup>   | 0.10±0.13 <sup>a</sup>    | 0.08±0.11 <sup>ab</sup>    | 0.02±0.00 <sup>ab</sup>  | 0.03±0.00 <sup>ab</sup>  | 0.00±0.00 <sup>b</sup>    | 0.00±0.00 <sup>b</sup>    | 0.10   |
|                        | C14:0        | 0.17±0.02 <sup>ab</sup>   | 0.20±0.03 <sup>a</sup>     | 0.17±0.06 <sup>ab</sup>   | 0.13±0.01 <sup>bc</sup>   | 0.12±0.01 <sup>c</sup>     | 0.11±0.01 <sup>c</sup>   | 0.13±0.00 <sup>c</sup>   | 0.12±0.00 <sup>c</sup>    | 0.14±0.00 <sup>bc</sup>   | 0.04   |
|                        | C16:0        | 16.60±0.18 <sup>a</sup>   | 18.38±2.58 <sup>abc</sup>  | 19.14±2.48 <sup>ab</sup>  | 17.28±0.33 <sup>bc</sup>  | 17.41±0.08 <sup>bc</sup>   | 13.20±0.28 <sup>d</sup>  | 16.57±0.07 <sup>c</sup>  | 16.39±0.07 <sup>c</sup>   | 20.34±0.17 <sup>a</sup>   | 2.07   |
|                        | C16:1        | 0.10±0.00 <sup>cd</sup>   | 0.12±0.02 <sup>bc</sup>    | 0.13±0.01 <sup>b</sup>    | 0.10±0.00 <sup>cd</sup>   | 0.10±0.01 <sup>cd</sup>    | 0.09±0.01 <sup>d</sup>   | 0.10±0.00 <sup>cd</sup>  | 0.13±0.02 <sup>b</sup>    | 0.15±0.02 <sup>a</sup>    | 0.02   |
|                        | C17:0        | 0.16±0.01 <sup>c</sup>    | 0.18±0.02 <sup>bc</sup>    | 0.18±0.02 <sup>b</sup>    | 0.18±0.00 <sup>bc</sup>   | 0.18±0.01 <sup>bc</sup>    | 0.14±0.00 <sup>d</sup>   | 0.17±0.00 <sup>bc</sup>  | 0.16±0.00 <sup>c</sup>    | 0.38±0.02 <sup>a</sup>    | 0.02   |
|                        | C18:0        | 5.76±0.07 <sup>bcd</sup>  | 6.35±0.88 <sup>ab</sup>    | 6.43±0.84 <sup>ab</sup>   | 6.54±0.16 <sup>a</sup>    | 6.30±0.25 <sup>abc</sup>   | 4.51±0.11 <sup>e</sup>   | 5.60±0.03 <sup>cd</sup>  | 5.49±0.04 <sup>d</sup>    | 6.12±0.06 <sup>abcd</sup> | 0.72   |
|                        | C18:1c&t     | 35.96±0.41 <sup>c</sup>   | 41.74±6.01 <sup>ab</sup>   | 42.78±5.54 <sup>a</sup>   | 37.44±0.75 <sup>bc</sup>  | 38.30±0.23 <sup>abc</sup>  | 28.07±0.55 <sup>d</sup>  | 36.64±0.20 <sup>c</sup>  | 36.85±0.23 <sup>c</sup>   | 38.80±0.42 <sup>abc</sup> | 4.72   |
|                        | C18:2c&t     | 64.36±0.94 <sup>de</sup>  | 81.10±12.18 <sup>ab</sup>  | 82.26±10.33 <sup>a</sup>  | 72.40±1.26 <sup>bcd</sup> | 74.86±0.52 <sup>abc</sup>  | 59.03±1.10 <sup>e</sup>  | 69.29±0.48 <sup>cd</sup> | 71.16±0.47 <sup>cd</sup>  | 75.15±0.72 <sup>cd</sup>  | 9.22   |
|                        | C18:3n3      | 12.07±0.19 <sup>ab</sup>  | 14.21±2.21 <sup>a</sup>    | 13.91±1.69 <sup>a</sup>   | 12.41±0.23 <sup>ab</sup>  | 12.99±0.08 <sup>ab</sup>   | 10.66±0.19 <sup>ab</sup> | 12.66±0.12 <sup>ab</sup> | 12.79±0.09 <sup>ab</sup>  | 8.94±7.74 <sup>b</sup>    | 4.71   |
|                        | C20:0        | 0.63±0.01 <sup>bc</sup>   | 0.68±0.09 <sup>ab</sup>    | 0.74±0.10 <sup>a</sup>    | 0.64±0.02 <sup>bc</sup>   | 0.65±0.01 <sup>bc</sup>    | 0.45±0.01 <sup>d</sup>   | 0.58±0.01 <sup>c</sup>   | 0.65±0.04 <sup>bc</sup>   | 0.61±0.02 <sup>bc</sup>   | 0.08   |
|                        | C20:1n9      | 0.52±0.04 <sup>ab</sup>   | 0.54±0.05 <sup>a</sup>     | 0.54±0.11 <sup>a</sup>    | 0.53±0.01 <sup>ab</sup>   | 0.46±0.00 <sup>b</sup>     | 0.32±0.01 <sup>c</sup>   | 0.49±0.02 <sup>ab</sup>  | 0.37±0.01 <sup>c</sup>    | 0.33±0.00 <sup>c</sup>    | 0.07   |
|                        | C20:2        | 0.06±0.01 <sup>cd</sup>   | 0.08±0.01 <sup>ab</sup>    | 0.08±0.02 <sup>a</sup>    | 0.06±0.00 <sup>bcd</sup>  | 0.06±0.00 <sup>bcd</sup>   | 0.05±0.00 <sup>d</sup>   | 0.07±0.00 <sup>abc</sup> | 0.06±0.00 <sup>abcd</sup> | 0.06±0.01 <sup>abcd</sup> | 0.01   |
|                        | C20:3n6&21:0 | 0.08±0.01 <sup>c</sup>    | 0.10±0.01 <sup>a</sup>     | 0.10±0.02 <sup>a</sup>    | 0.08±0.00 <sup>bc</sup>   | 0.08±0.01 <sup>c</sup>     | 0.06±0.01 <sup>d</sup>   | 0.08±0.00 <sup>c</sup>   | 0.08±0.00 <sup>bc</sup>   | 0.10±0.00 <sup>ab</sup>   | 0.01   |
|                        | C22:0        | 1.02±0.02 <sup>bc</sup>   | 1.11±0.15 <sup>ab</sup>    | 1.19±0.16 <sup>a</sup>    | 0.99±0.03 <sup>bc</sup>   | 1.01±0.01 <sup>bc</sup>    | 0.71±0.02 <sup>d</sup>   | 0.98±0.01 <sup>c</sup>   | 1.01±0.02 <sup>bc</sup>   | 1.11±0.02 <sup>abc</sup>  | 0.13   |
|                        | C22:1n9      | 0.03±0.01 <sup>d</sup>    | 0.05±0.00 <sup>bc</sup>    | 0.06±0.01 <sup>a</sup>    | 0.06±0.01 <sup>ab</sup>   | 0.06±0.00 <sup>a</sup>     | 0.06±0.01 <sup>a</sup>   | 0.04±0.00 <sup>c</sup>   | 0.00±0.00 <sup>e</sup>    | 0.02±0.01 <sup>d</sup>    | 0.01   |
|                        | C23:0        | 0.13±0.01 <sup>abc</sup>  | 0.15±0.02 <sup>ab</sup>    | 0.14±0.02 <sup>abc</sup>  | 0.13±0.01 <sup>abc</sup>  | 0.15±0.02 <sup>a</sup>     | 0.16±0.03 <sup>a</sup>   | 0.12±0.00 <sup>c</sup>   | 0.12±0.00 <sup>bc</sup>   | 0.14±0.00 <sup>abc</sup>  | 0.03   |
|                        | C24:0        | 0.29±0.01 <sup>c</sup>    | 0.34±0.04 <sup>ab</sup>    | 0.35±0.05 <sup>a</sup>    | 0.30±0.00 <sup>c</sup>    | 0.30±0.02 <sup>bc</sup>    | 0.23±0.00 <sup>d</sup>   | 0.38±0.00 <sup>a</sup>   | 0.30±0.02 <sup>c</sup>    | 0.28±0.01 <sup>c</sup>    | 0.04   |
|                        | Total        | 137.98±1.75 <sup>b</sup>  | 165.35±24.30 <sup>a</sup>  | 168.22±21.43 <sup>a</sup> | 149.36±2.68 <sup>ab</sup> | 153.13±0.74 <sup>ab</sup>  | 117.86±2.25 <sup>c</sup> | 143.91±0.86 <sup>b</sup> | 145.71±0.89 <sup>b</sup>  | 152.67±6.71 <sup>ab</sup> | 19.07  |
|                        | ΣSFA         | 24.88±0.24 <sup>bc</sup>  | 27.52±3.82 <sup>ab</sup>   | 28.46±3.75 <sup>a</sup>   | 26.37±0.44 <sup>abc</sup> | 26.29±0.35 <sup>abc</sup>  | 19.59±0.41 <sup>d</sup>  | 24.63±0.12 <sup>bc</sup> | 24.34±0.11 <sup>c</sup>   | 29.21±0.23 <sup>a</sup>   | 3.09   |
|                        | ΣUFA         | 113.10±1.51 <sup>cd</sup> | 137.83±20.48 <sup>ab</sup> | 139.76±17.68 <sup>a</sup> | 122.99±2.25 <sup>bc</sup> | 126.84±0.82 <sup>abc</sup> | 98.27±1.85 <sup>d</sup>  | 119.29±0.77 <sup>c</sup> | 121.36±0.79 <sup>c</sup>  | 123.45±6.83 <sup>bc</sup> | 16.086 |

ΣSFA; sum of saturated fatty acids, ΣUFA; sum of unsaturated fatty acids.



**Table S8.** Fatty acid content of raw soybean flour packaged in polypropylene film and stored under room temperature conditions ( $\text{mg}\cdot\text{g}^{-1}$ , dry basis,  $p < 0.05$ ,  $n = 3$ ).

|                               |                          | Storage duration          |                           |                           |                            |                            |                           |                           |                           |                           | LSD  |
|-------------------------------|--------------------------|---------------------------|---------------------------|---------------------------|----------------------------|----------------------------|---------------------------|---------------------------|---------------------------|---------------------------|------|
|                               |                          | Initial                   | 1W                        | 2W                        | 4W                         | 8W                         | 12W                       | 24W                       | 36W                       | 48W                       |      |
| Room<br>temperature<br>(20°C) | C6:0                     | 0.02±0.00 <sup>ab</sup>   | 0.02±0.00 <sup>c</sup>    | 0.02±0.00 <sup>abc</sup>  | 0.02±0.00 <sup>abc</sup>   | 0.02±0.00 <sup>bc</sup>    | 0.02±0.00 <sup>d</sup>    | 0.02±0.00 <sup>a</sup>    | 0.00±0.00 <sup>e</sup>    | 0.00±0.00 <sup>e</sup>    | 0.00 |
|                               | C14:0                    | 0.17±0.02 <sup>b</sup>    | 0.19±0.01 <sup>ab</sup>   | 0.20±0.03 <sup>a</sup>    | 0.13±0.01 <sup>c</sup>     | 0.12±0.01 <sup>cd</sup>    | 0.10±0.01 <sup>d</sup>    | 0.12±0.00 <sup>cd</sup>   | 0.13±0.00 <sup>c</sup>    | 0.14±0.00 <sup>c</sup>    | 0.02 |
|                               | C16:0                    | 16.60±0.18 <sup>bc</sup>  | 16.67±0.08 <sup>bc</sup>  | 18.90±1.63 <sup>a</sup>   | 16.95±0.48 <sup>b</sup>    | 16.89±0.12 <sup>bc</sup>   | 12.60±0.12 <sup>d</sup>   | 16.12±0.06 <sup>bc</sup>  | 15.92±0.09 <sup>c</sup>   | 19.60±0.16 <sup>a</sup>   | 0.99 |
|                               | C16:1                    | 0.10±0.00 <sup>d</sup>    | 0.11±0.00 <sup>cd</sup>   | 0.12±0.02 <sup>bc</sup>   | 0.11±0.01 <sup>cd</sup>    | 0.11±0.01 <sup>bcd</sup>   | 0.08±0.00 <sup>e</sup>    | 0.10±0.00 <sup>d</sup>    | 0.13±0.01 <sup>b</sup>    | 0.15±0.01 <sup>a</sup>    | 0.01 |
|                               | C17:0                    | 0.16±0.01 <sup>cde</sup>  | 0.17±0.00 <sup>cde</sup>  | 0.18±0.01 <sup>b</sup>    | 0.17±0.01 <sup>bc</sup>    | 0.17±0.00 <sup>bcd</sup>   | 0.14±0.00 <sup>f</sup>    | 0.16±0.00 <sup>de</sup>   | 0.16±0.00 <sup>e</sup>    | 0.36±0.01 <sup>a</sup>    | 0.01 |
|                               | C18:0                    | 5.76±0.07 <sup>bc</sup>   | 5.76±0.03 <sup>bc</sup>   | 6.31±0.55 <sup>a</sup>    | 6.02±0.35 <sup>ab</sup>    | 5.85±0.04 <sup>b</sup>     | 4.29±0.06 <sup>e</sup>    | 5.45±0.01 <sup>cd</sup>   | 5.31±0.05 <sup>d</sup>    | 5.91±0.05 <sup>b</sup>    | 0.38 |
|                               | C18:1c&t                 | 35.96±0.41 <sup>bc</sup>  | 37.73±0.11 <sup>ab</sup>  | 42.16±3.61 <sup>a</sup>   | 37.12±1.19 <sup>abc</sup>  | 32.05±8.93 <sup>c</sup>    | 26.40±0.26 <sup>d</sup>   | 35.59±0.15 <sup>bc</sup>  | 35.46±0.29 <sup>bc</sup>  | 38.02±0.46 <sup>ab</sup>  | 5.57 |
|                               | C18:2c&t                 | 64.36±0.94 <sup>d</sup>   | 72.83±0.34 <sup>b</sup>   | 80.54±6.73 <sup>a</sup>   | 71.89±2.50 <sup>bc</sup>   | 72.97±0.79 <sup>b</sup>    | 55.66±0.47 <sup>e</sup>   | 67.41±0.46 <sup>d</sup>   | 67.94±0.47 <sup>cd</sup>  | 73.15±1.07 <sup>b</sup>   | 4.24 |
|                               | C18:3n3                  | 12.07±0.19 <sup>c</sup>   | 12.69±0.08 <sup>bc</sup>  | 13.58±1.10 <sup>a</sup>   | 12.30±0.47 <sup>bc</sup>   | 12.60±0.17 <sup>bc</sup>   | 9.94±0.12 <sup>d</sup>    | 12.26±0.12 <sup>bc</sup>  | 12.03±0.12 <sup>c</sup>   | 12.85±0.25 <sup>b</sup>   | 0.73 |
|                               | C20:0                    | 0.63±0.01 <sup>b</sup>    | 0.63±0.01 <sup>b</sup>    | 0.71±0.06 <sup>a</sup>    | 0.63±0.01 <sup>b</sup>     | 0.63±0.01 <sup>b</sup>     | 0.43±0.01 <sup>d</sup>    | 0.57±0.00 <sup>c</sup>    | 0.69±0.01 <sup>a</sup>    | 0.62±0.01 <sup>b</sup>    | 0.04 |
|                               | C20:1n9                  | 0.52±0.04 <sup>ab</sup>   | 0.51±0.01 <sup>abc</sup>  | 0.55±0.07 <sup>a</sup>    | 0.51±0.03 <sup>abc</sup>   | 0.46±0.02 <sup>c</sup>     | 0.31±0.02 <sup>e</sup>    | 0.47±0.01 <sup>a</sup>    | 0.36±0.00 <sup>de</sup>   | 0.38±0.04 <sup>d</sup>    | 0.05 |
|                               | C20:2                    | 0.06±0.01 <sup>ab</sup>   | 0.07±0.01 <sup>a</sup>    | 0.07±0.02 <sup>a</sup>    | 0.06±0.01 <sup>ab</sup>    | 0.07±0.00 <sup>a</sup>     | 0.05±0.01 <sup>b</sup>    | 0.07±0.00 <sup>ab</sup>   | 0.06±0.00 <sup>ab</sup>   | 0.07±0.00 <sup>a</sup>    | 0.01 |
|                               | C20:3n6&21:0             | 0.08±0.01 <sup>c</sup>    | 0.08±0.00 <sup>bc</sup>   | 0.10±0.00 <sup>a</sup>    | 0.08±0.01 <sup>c</sup>     | 0.08±0.01 <sup>c</sup>     | 0.06±0.01 <sup>d</sup>    | 0.08±0.00 <sup>c</sup>    | 0.08±0.00 <sup>c</sup>    | 0.09±0.01 <sup>ab</sup>   | 0.01 |
|                               | C22:0                    | 1.02±0.02 <sup>b</sup>    | 1.02±0.00 <sup>b</sup>    | 1.14±0.10 <sup>a</sup>    | 0.99±0.03 <sup>bc</sup>    | 0.99±0.02 <sup>bc</sup>    | 0.69±0.01 <sup>d</sup>    | 0.94±0.00 <sup>c</sup>    | 0.95±0.00 <sup>c</sup>    | 1.10±0.02 <sup>a</sup>    | 0.06 |
|                               | C22:1n9                  | 0.03±0.01 <sup>c</sup>    | 0.05±0.00 <sup>b</sup>    | 0.05±0.01 <sup>b</sup>    | 0.05±0.01 <sup>b</sup>     | 0.07±0.01 <sup>a</sup>     | 0.05±0.01 <sup>b</sup>    | 0.06±0.00 <sup>b</sup>    | 0.00±0.00 <sup>d</sup>    | 0.01±0.01 <sup>d</sup>    | 0.01 |
|                               | C23:0                    | 0.13±0.01 <sup>abc</sup>  | 0.14±0.00 <sup>ab</sup>   | 0.14±0.02 <sup>a</sup>    | 0.12±0.02 <sup>cd</sup>    | 0.12±0.01 <sup>bcd</sup>   | 0.12±0.01 <sup>cd</sup>   | 0.12±0.00 <sup>cd</sup>   | 0.11±0.01 <sup>d</sup>    | 0.13±0.01 <sup>abcd</sup> | 0.02 |
|                               | C24:0                    | 0.29±0.01 <sup>bc</sup>   | 0.30±0.01 <sup>b</sup>    | 0.34±0.03 <sup>a</sup>    | 0.28±0.01 <sup>bcd</sup>   | 0.29±0.01 <sup>bc</sup>    | 0.21±0.02 <sup>e</sup>    | 0.36±0.00 <sup>a</sup>    | 0.27±0.01 <sup>cd</sup>   | 0.26±0.01 <sup>d</sup>    | 0.02 |
|                               | Total                    | 137.98±1.75 <sup>d</sup>  | 148.97±0.51 <sup>bc</sup> | 165.13±13.92 <sup>a</sup> | 147.45±4.71 <sup>bcd</sup> | 143.51±8.19 <sup>bcd</sup> | 111.15±1.01 <sup>e</sup>  | 139.89±0.79 <sup>cd</sup> | 139.59±0.97 <sup>cd</sup> | 152.83±1.99 <sup>b</sup>  | 9.78 |
| ∑SFA                          | 24.88±0.24 <sup>bc</sup> | 24.99±0.11 <sup>bc</sup>  | 28.06±2.44 <sup>a</sup>   | 25.41±0.78 <sup>b</sup>   | 25.18±0.17 <sup>b</sup>    | 18.66±0.17 <sup>d</sup>    | 23.93±0.07 <sup>bc</sup>  | 23.63±0.16 <sup>c</sup>   | 28.21±0.23 <sup>a</sup>   | 1.49                      |      |
| ∑UFA                          | 113.10±1.51 <sup>d</sup> | 123.99±0.44 <sup>bc</sup> | 137.07±11.49 <sup>a</sup> | 122.04±4.15 <sup>bc</sup> | 118.33±8.31 <sup>bcd</sup> | 92.49±0.84 <sup>e</sup>    | 115.95±0.72 <sup>cd</sup> | 115.96±0.82 <sup>cd</sup> | 124.62±1.76 <sup>b</sup>  | 8.59                      |      |

∑SFA; sum of saturated fatty acids, ∑UFA; sum of unsaturated fatty acids.

**Table S9.** Fatty acid content of raw soybean flour packaged in polypropylene film and stored under high temperature conditions ( $\text{mg}\cdot\text{g}^{-1}$ , dry basis,  $p < 0.05$ ,  $n = 3$ ).

|              | Initial                  | Storage duration         |                          |                            |                           |                          |                           |                           |                          | LSD                    |      |
|--------------|--------------------------|--------------------------|--------------------------|----------------------------|---------------------------|--------------------------|---------------------------|---------------------------|--------------------------|------------------------|------|
|              |                          | 1W                       | 2W                       | 4W                         | 8W                        | 12W                      | 24W                       | 36W                       | 48W                      |                        |      |
| C6:0         | 0.02±0.00 <sup>b</sup>   | 0.02±0.00 <sup>b</sup>   | 0.02±0.00 <sup>b</sup>   | 0.02±0.00 <sup>b</sup>     | 0.02±0.00 <sup>b</sup>    | 0.02±0.00 <sup>b</sup>   | 0.02±0.00 <sup>c</sup>    | 0.04±0.01 <sup>a</sup>    | 0.00±0.00 <sup>d</sup>   | 0.00±0.00 <sup>d</sup> | 0.00 |
| C14:0        | 0.17±0.02 <sup>b</sup>   | 0.18±0.00 <sup>ab</sup>  | 0.20±0.01 <sup>a</sup>   | 0.12±0.00 <sup>cd</sup>    | 0.13±0.01 <sup>cd</sup>   | 0.11±0.01 <sup>d</sup>   | 0.13±0.01 <sup>cd</sup>   | 0.13±0.01 <sup>c</sup>    | 0.13±0.01 <sup>c</sup>   | 0.14±0.00 <sup>c</sup> | 0.02 |
| C16:0        | 16.60±0.18 <sup>c</sup>  | 16.91±0.20 <sup>c</sup>  | 18.92±0.32 <sup>b</sup>  | 16.63±1.33 <sup>c</sup>    | 16.89±0.54 <sup>c</sup>   | 13.59±0.17 <sup>d</sup>  | 17.00±0.19 <sup>c</sup>   | 16.58±0.22 <sup>c</sup>   | 20.24±0.31 <sup>a</sup>  | 0.89                   |      |
| C16:1        | 0.10±0.00 <sup>cd</sup>  | 0.10±0.00 <sup>bc</sup>  | 0.12±0.01 <sup>b</sup>   | 0.10±0.01 <sup>cd</sup>    | 0.10±0.01 <sup>c</sup>    | 0.09±0.00 <sup>d</sup>   | 0.11±0.02 <sup>bc</sup>   | 0.11±0.01 <sup>bc</sup>   | 0.15±0.01 <sup>a</sup>   | 0.02                   |      |
| C17:0        | 0.16±0.01 <sup>bc</sup>  | 0.18±0.01 <sup>b</sup>   | 0.17±0.01 <sup>b</sup>   | 0.17±0.02 <sup>bc</sup>    | 0.17±0.00 <sup>b</sup>    | 0.15±0.01 <sup>c</sup>   | 0.16±0.02 <sup>bc</sup>   | 0.17±0.00 <sup>bc</sup>   | 0.38±0.01 <sup>a</sup>   | 0.02                   |      |
| C18:0        | 5.76±0.07 <sup>d</sup>   | 5.85±0.06 <sup>cd</sup>  | 6.32±0.10 <sup>ab</sup>  | 5.75±0.44 <sup>d</sup>     | 6.47±0.17 <sup>a</sup>    | 4.68±0.13 <sup>e</sup>   | 5.74±0.12 <sup>d</sup>    | 5.56±0.07 <sup>d</sup>    | 6.12±0.12 <sup>bc</sup>  | 0.31                   |      |
| C18:1c&t     | 35.96±0.41 <sup>d</sup>  | 38.33±0.46 <sup>bc</sup> | 42.17±0.72 <sup>a</sup>  | 36.56±2.98 <sup>cd</sup>   | 36.82±1.18 <sup>bcd</sup> | 28.78±0.40 <sup>e</sup>  | 36.61±1.88 <sup>cd</sup>  | 36.92±0.50 <sup>bcd</sup> | 38.89±0.66 <sup>d</sup>  | 2.26                   |      |
| C18:2c&t     | 64.36±0.94 <sup>de</sup> | 74.03±0.82 <sup>b</sup>  | 80.62±1.24 <sup>a</sup>  | 70.54±5.66 <sup>bc</sup>   | 71.69±2.35 <sup>b</sup>   | 60.29±0.79 <sup>e</sup>  | 64.70±7.77 <sup>cde</sup> | 69.74±1.17 <sup>bcd</sup> | 72.77±1.69 <sup>b</sup>  | 5.88                   |      |
| C18:3n3      | 12.07±0.19 <sup>bc</sup> | 12.93±0.14 <sup>ab</sup> | 13.54±0.22 <sup>a</sup>  | 12.04±0.96 <sup>bc</sup>   | 12.28±0.41 <sup>b</sup>   | 10.70±0.17 <sup>d</sup>  | 11.10±1.69 <sup>cd</sup>  | 11.85±0.19 <sup>bcd</sup> | 11.98±0.29 <sup>bc</sup> | 1.17                   |      |
| C20:0        | 0.63±0.01 <sup>bc</sup>  | 0.63±0.01 <sup>b</sup>   | 0.72±0.02 <sup>b</sup>   | 0.61±0.05 <sup>bc</sup>    | 0.63±0.01 <sup>b</sup>    | 0.47±0.00 <sup>d</sup>   | 0.59±0.02 <sup>c</sup>    | 0.71±0.00 <sup>a</sup>    | 0.65±0.02 <sup>b</sup>   | 0.04                   |      |
| C20:1n9      | 0.52±0.04 <sup>ab</sup>  | 0.52±0.01 <sup>ab</sup>  | 0.57±0.02 <sup>a</sup>   | 0.52±0.05 <sup>ab</sup>    | 0.46±0.03 <sup>b</sup>    | 0.32±0.02 <sup>c</sup>   | 0.55±0.04 <sup>a</sup>    | 0.38±0.01 <sup>c</sup>    | 0.38±0.08 <sup>c</sup>   | 0.07                   |      |
| C20:2        | 0.06±0.01 <sup>cd</sup>  | 0.07±0.01 <sup>ab</sup>  | 0.08±0.01 <sup>a</sup>   | 0.06±0.01 <sup>cd</sup>    | 0.06±0.01 <sup>cd</sup>   | 0.05±0.00 <sup>d</sup>   | 0.06±0.01 <sup>d</sup>    | 0.07±0.01 <sup>bcd</sup>  | 0.07±0.01 <sup>abc</sup> | 0.01                   |      |
| C20:3n6&21:0 | 0.08±0.01 <sup>bc</sup>  | 0.09±0.00 <sup>ab</sup>  | 0.09±0.01 <sup>ab</sup>  | 0.09±0.01 <sup>a</sup>     | 0.08±0.01 <sup>ab</sup>   | 0.06±0.01 <sup>c</sup>   | 0.08±0.00 <sup>ab</sup>   | 0.09±0.01 <sup>ab</sup>   | 0.09±0.00 <sup>a</sup>   | 0.01                   |      |
| C22:0        | 1.02±0.02 <sup>bc</sup>  | 1.04±0.02 <sup>b</sup>   | 1.15±0.01 <sup>a</sup>   | 0.98±0.08 <sup>c</sup>     | 0.99±0.02 <sup>bc</sup>   | 0.73±0.02 <sup>d</sup>   | 0.98±0.03 <sup>bc</sup>   | 1.02±0.01 <sup>bc</sup>   | 1.16±0.04 <sup>a</sup>   | 0.06                   |      |
| C22:1n9      | 0.03±0.01 <sup>g</sup>   | 0.05±0.00 <sup>ef</sup>  | 0.06±0.01 <sup>de</sup>  | 0.05±0.01 <sup>f</sup>     | 0.08±0.00 <sup>c</sup>    | 0.09±0.01 <sup>b</sup>   | 0.06±0.01 <sup>d</sup>    | 0.16±0.01 <sup>a</sup>    | 0.04±0.01 <sup>f</sup>   | 0.01                   |      |
| C23:0        | 0.13±0.01 <sup>abc</sup> | 0.13±0.00 <sup>abc</sup> | 0.14±0.01 <sup>ab</sup>  | 0.12±0.02 <sup>c</sup>     | 0.14±0.01 <sup>a</sup>    | 0.13±0.02 <sup>bc</sup>  | 0.12±0.00 <sup>c</sup>    | 0.12±0.00 <sup>bc</sup>   | 0.14±0.01 <sup>ab</sup>  | 0.02                   |      |
| C24:0        | 0.29±0.01 <sup>c</sup>   | 0.33±0.01 <sup>b</sup>   | 0.35±0.01 <sup>b</sup>   | 0.28±0.03 <sup>c</sup>     | 0.29±0.02 <sup>c</sup>    | 0.24±0.01 <sup>d</sup>   | 0.38±0.00 <sup>a</sup>    | 0.29±0.01 <sup>c</sup>    | 0.28±0.01 <sup>c</sup>   | 0.02                   |      |
| Total        | 137.98±1.75 <sup>c</sup> | 151.39±1.68 <sup>b</sup> | 165.24±2.63 <sup>a</sup> | 144.64±11.63 <sup>bc</sup> | 147.31±4.72 <sup>bc</sup> | 120.50±1.64 <sup>d</sup> | 138.41±11.58 <sup>c</sup> | 143.90±2.19 <sup>bc</sup> | 153.47±3.22 <sup>b</sup> | 10.27                  |      |
| ∑SFA         | 24.88±0.24 <sup>b</sup>  | 25.36±0.27 <sup>b</sup>  | 28.08±0.45 <sup>a</sup>  | 24.77±1.97 <sup>b</sup>    | 25.83±0.76 <sup>b</sup>   | 20.18±0.30 <sup>c</sup>  | 25.23±0.32 <sup>b</sup>   | 24.66±0.31 <sup>b</sup>   | 29.19±0.50 <sup>a</sup>  | 1.32                   |      |
| ∑UFA         | 113.10±1.51 <sup>c</sup> | 126.04±1.41 <sup>b</sup> | 137.16±2.18 <sup>a</sup> | 119.87±9.67 <sup>bc</sup>  | 121.49±3.96 <sup>bc</sup> | 100.32±1.39 <sup>d</sup> | 113.18±11.30 <sup>c</sup> | 119.24±1.88 <sup>bc</sup> | 124.28±2.72 <sup>b</sup> | 9.20                   |      |

∑SFA; sum of saturated fatty acids, ∑UFA; sum of unsaturated fatty acids.

**Table S10.** Fatty acid content of roasted soybean flour packaged in polypropylene film and stored under refrigerated conditions ( $\text{mg}\cdot\text{g}^{-1}$ , dry basis,  $p < 0.05$ ,  $n = 3$ ).

|              | Initial                   | Storage duration          |                           |                          |                            |                          |                           |                           |                           | LSD  |
|--------------|---------------------------|---------------------------|---------------------------|--------------------------|----------------------------|--------------------------|---------------------------|---------------------------|---------------------------|------|
|              |                           | 1W                        | 2W                        | 4W                       | 8W                         | 12W                      | 24W                       | 36W                       | 48W                       |      |
| C6:0         | 0.04±0.00 <sup>b</sup>    | 0.04±0.00 <sup>a</sup>    | 0.04±0.00 <sup>b</sup>    | 0.03±0.00 <sup>c</sup>   | 0.03±0.00 <sup>b</sup>     | 0.02±0.00 <sup>d</sup>   | 0.03±0.00 <sup>b</sup>    | 0.00±0.00 <sup>e</sup>    | 0.00±0.00 <sup>e</sup>    | 0.00 |
| C14:0        | 0.19±0.02 <sup>a</sup>    | 0.19±0.01 <sup>a</sup>    | 0.19±0.01 <sup>a</sup>    | 0.11±0.00 <sup>cd</sup>  | 0.12±0.00 <sup>bc</sup>    | 0.10±0.00 <sup>d</sup>   | 0.13±0.00 <sup>b</sup>    | 0.12±0.00 <sup>bc</sup>   | 0.13±0.00 <sup>b</sup>    | 0.02 |
| C16:0        | 16.36±0.21 <sup>cde</sup> | 16.97±0.27 <sup>bcd</sup> | 18.22±1.26 <sup>b</sup>   | 15.59±0.57 <sup>de</sup> | 17.33±0.09 <sup>bc</sup>   | 13.74±0.17 <sup>f</sup>  | 16.77±0.08 <sup>bcd</sup> | 14.89±2.61 <sup>ef</sup>  | 20.32±0.17 <sup>a</sup>   | 1.70 |
| C16:1        | 0.10±0.00 <sup>cd</sup>   | 0.11±0.01 <sup>bc</sup>   | 0.13±0.02 <sup>a</sup>    | 0.09±0.01 <sup>cd</sup>  | 0.11±0.01 <sup>bc</sup>    | 0.09±0.01 <sup>d</sup>   | 0.10±0.00 <sup>cd</sup>   | 0.12±0.01 <sup>ab</sup>   | 0.13±0.01 <sup>a</sup>    | 0.02 |
| C17:0        | 0.16±0.01 <sup>cde</sup>  | 0.17±0.00 <sup>bcd</sup>  | 0.18±0.01 <sup>b</sup>    | 0.16±0.01 <sup>de</sup>  | 0.18±0.01 <sup>bc</sup>    | 0.15±0.00 <sup>e</sup>   | 0.17±0.00 <sup>bcd</sup>  | 0.17±0.00 <sup>cde</sup>  | 0.36±0.02 <sup>a</sup>    | 0.02 |
| C18:0        | 5.63±0.07 <sup>c</sup>    | 5.81±0.10 <sup>bc</sup>   | 6.09±0.42 <sup>ab</sup>   | 5.48±0.20 <sup>c</sup>   | 6.27±0.29 <sup>a</sup>     | 4.63±0.06 <sup>d</sup>   | 5.64±0.04 <sup>c</sup>    | 5.48±0.06 <sup>c</sup>    | 6.08±0.07 <sup>ab</sup>   | 0.33 |
| C18:1c&t     | 35.33±0.47 <sup>de</sup>  | 38.05±0.53 <sup>bc</sup>  | 40.30±2.70 <sup>a</sup>   | 34.01±1.28 <sup>e</sup>  | 37.76±0.42 <sup>bc</sup>   | 29.28±0.79 <sup>f</sup>  | 36.86±0.18 <sup>cd</sup>  | 36.62±0.34 <sup>cd</sup>  | 39.08±0.33 <sup>ab</sup>  | 1.85 |
| C18:2c&t     | 63.13±0.83 <sup>de</sup>  | 73.30±0.87 <sup>a</sup>   | 76.67±4.99 <sup>a</sup>   | 65.97±2.46 <sup>cd</sup> | 73.88±0.72 <sup>a</sup>    | 61.52±1.29 <sup>e</sup>  | 69.32±0.33 <sup>bc</sup>  | 69.77±0.72 <sup>b</sup>   | 73.71±1.33 <sup>a</sup>   | 3.48 |
| C18:3n3      | 11.89±0.16 <sup>bc</sup>  | 12.75±0.15 <sup>a</sup>   | 12.89±0.85 <sup>a</sup>   | 11.35±0.40 <sup>cd</sup> | 12.82±0.13 <sup>a</sup>    | 11.10±0.28 <sup>d</sup>  | 12.61±0.07 <sup>a</sup>   | 12.36±0.15 <sup>ab</sup>  | 12.87±0.29 <sup>a</sup>   | 0.61 |
| C20:0        | 0.61±0.00 <sup>bc</sup>   | 0.62±0.01 <sup>abc</sup>  | 0.70±0.05 <sup>a</sup>    | 0.59±0.02 <sup>c</sup>   | 0.65±0.01 <sup>abc</sup>   | 0.46±0.02 <sup>d</sup>   | 0.59±0.00 <sup>c</sup>    | 0.68±0.01 <sup>ab</sup>   | 0.68±0.14 <sup>ab</sup>   | 0.09 |
| C20:1n9      | 0.51±0.03 <sup>abc</sup>  | 0.53±0.04 <sup>ab</sup>   | 0.57±0.06 <sup>a</sup>    | 0.47±0.04 <sup>c</sup>   | 0.47±0.01 <sup>c</sup>     | 0.35±0.03 <sup>d</sup>   | 0.49±0.02 <sup>bc</sup>   | 0.38±0.00 <sup>d</sup>    | 0.37±0.06 <sup>d</sup>    | 0.06 |
| C20:2        | 0.05±0.01 <sup>d</sup>    | 0.06±0.01 <sup>abc</sup>  | 0.06±0.01 <sup>abc</sup>  | 0.05±0.00 <sup>cd</sup>  | 0.07±0.00 <sup>a</sup>     | 0.06±0.01 <sup>bcd</sup> | 0.06±0.00 <sup>abc</sup>  | 0.06±0.00 <sup>abc</sup>  | 0.07±0.01 <sup>ab</sup>   | 0.01 |
| C20:3n6&21:0 | 0.08±0.01 <sup>bcd</sup>  | 0.09±0.01 <sup>a</sup>    | 0.09±0.00 <sup>a</sup>    | 0.07±0.01 <sup>cd</sup>  | 0.08±0.01 <sup>ab</sup>    | 0.06±0.01 <sup>d</sup>   | 0.08±0.00 <sup>abc</sup>  | 0.09±0.00 <sup>ab</sup>   | 0.09±0.01 <sup>ab</sup>   | 0.01 |
| C22:0        | 0.99±0.01 <sup>b</sup>    | 1.02±0.03 <sup>b</sup>    | 1.11±0.08 <sup>a</sup>    | 0.90±0.03 <sup>c</sup>   | 1.00±0.01 <sup>b</sup>     | 0.75±0.03 <sup>d</sup>   | 0.98±0.01 <sup>b</sup>    | 0.99±0.01 <sup>b</sup>    | 1.10±0.02 <sup>a</sup>    | 0.05 |
| C22:1n9      | 0.05±0.01 <sup>bc</sup>   | 0.05±0.01 <sup>c</sup>    | 0.07±0.02 <sup>a</sup>    | 0.03±0.00 <sup>d</sup>   | 0.06±0.01 <sup>ab</sup>    | 0.05±0.01 <sup>bc</sup>  | 0.04±0.01 <sup>cd</sup>   | 0.00±0.00 <sup>e</sup>    | 0.00±0.00 <sup>e</sup>    | 0.02 |
| C23:0        | 0.12±0.00 <sup>bcd</sup>  | 0.13±0.01 <sup>abcd</sup> | 0.15±0.01 <sup>ab</sup>   | 0.12±0.01 <sup>cd</sup>  | 0.14±0.02 <sup>abc</sup>   | 0.12±0.03 <sup>d</sup>   | 0.12±0.00 <sup>cd</sup>   | 0.13±0.01 <sup>bcd</sup>  | 0.15±0.01 <sup>a</sup>    | 0.02 |
| C24:0        | 0.29±0.01 <sup>c</sup>    | 0.33±0.00 <sup>b</sup>    | 0.34±0.02 <sup>b</sup>    | 0.25±0.01 <sup>d</sup>   | 0.29±0.01 <sup>c</sup>     | 0.24±0.01 <sup>e</sup>   | 0.36±0.00 <sup>a</sup>    | 0.28±0.01 <sup>c</sup>    | 0.28±0.01 <sup>c</sup>    | 0.02 |
| Total        | 135.56±1.77 <sup>e</sup>  | 150.23±1.91 <sup>bc</sup> | 157.81±10.41 <sup>a</sup> | 135.27±4.90 <sup>e</sup> | 151.26±1.23 <sup>abc</sup> | 122.72±2.60 <sup>f</sup> | 144.37±0.69 <sup>cd</sup> | 142.14±2.60 <sup>de</sup> | 155.42±1.97 <sup>ab</sup> | 7.20 |
| ∑SFA         | 24.48±0.30 <sup>cde</sup> | 25.38±0.40 <sup>bc</sup>  | 27.10±1.85 <sup>b</sup>   | 23.31±0.75 <sup>de</sup> | 26.09±0.34 <sup>bc</sup>   | 20.27±0.25 <sup>f</sup>  | 24.87±0.13 <sup>cd</sup>  | 22.82±2.56 <sup>e</sup>   | 29.19±0.28 <sup>a</sup>   | 1.90 |
| ∑UFA         | 111.08±1.47 <sup>c</sup>  | 124.85±1.53 <sup>ab</sup> | 130.71±8.57 <sup>a</sup>  | 111.96±4.18 <sup>c</sup> | 125.17±1.25 <sup>ab</sup>  | 102.45±2.37 <sup>d</sup> | 119.50±0.57 <sup>b</sup>  | 119.32±1.20 <sup>b</sup>  | 126.23±1.88 <sup>a</sup>  | 5.94 |

∑SFA; sum of saturated fatty acids, ∑UFA; sum of unsaturated fatty acids.

**Table S11.** Fatty acid content of roasted soybean flour packaged in polypropylene film and stored under room temperature conditions ( $\text{mg}\cdot\text{g}^{-1}$ , dry basis,  $p < 0.05$ ,  $n = 3$ ).

|                               |              | Storage duration          |                          |                          |                           |                           |                          |                           |                            |                          | LSD  |
|-------------------------------|--------------|---------------------------|--------------------------|--------------------------|---------------------------|---------------------------|--------------------------|---------------------------|----------------------------|--------------------------|------|
|                               |              | Initial                   | 1W                       | 2W                       | 4W                        | 8W                        | 12W                      | 24W                       | 36W                        | 48W                      |      |
| Room<br>temperature<br>(20°C) | C6:0         | 0.04±0.00 <sup>bc</sup>   | 0.04±0.00 <sup>a</sup>   | 0.04±0.00 <sup>b</sup>   | 0.03±0.00 <sup>d</sup>    | 0.03±0.00 <sup>c</sup>    | 0.02±0.00 <sup>e</sup>   | 0.03±0.00 <sup>d</sup>    | 0.00±0.00 <sup>f</sup>     | 0.00±0.00 <sup>f</sup>   | 0.00 |
|                               | C14:0        | 0.19±0.02 <sup>a</sup>    | 0.19±0.00 <sup>a</sup>   | 0.21±0.02 <sup>a</sup>   | 0.12±0.01 <sup>b</sup>    | 0.12±0.00 <sup>b</sup>    | 0.11±0.00 <sup>b</sup>   | 0.13±0.00 <sup>b</sup>    | 0.13±0.01 <sup>b</sup>     | 0.12±0.00 <sup>b</sup>   | 0.02 |
|                               | C16:0        | 16.36±0.21 <sup>bc</sup>  | 16.96±0.12 <sup>b</sup>  | 19.93±0.46 <sup>a</sup>  | 15.68±0.34 <sup>c</sup>   | 17.00±0.05 <sup>b</sup>   | 13.16±0.15 <sup>d</sup>  | 16.44±0.08 <sup>bc</sup>  | 16.57±1.23 <sup>b</sup>    | 17.09±0.19 <sup>b</sup>  | 0.80 |
|                               | C16:1        | 0.10±0.00 <sup>cd</sup>   | 0.10±0.02 <sup>cd</sup>  | 0.12±0.01 <sup>ab</sup>  | 0.10±0.01 <sup>cd</sup>   | 0.11±0.01 <sup>bc</sup>   | 0.08±0.00 <sup>d</sup>   | 0.12±0.03 <sup>abc</sup>  | 0.14±0.01 <sup>a</sup>     | 0.14±0.01 <sup>a</sup>   | 0.02 |
|                               | C17:0        | 0.16±0.01 <sup>cd</sup>   | 0.17±0.01 <sup>c</sup>   | 0.19±0.01 <sup>b</sup>   | 0.17±0.00 <sup>c</sup>    | 0.17±0.01 <sup>c</sup>    | 0.15±0.00 <sup>d</sup>   | 0.16±0.00 <sup>cd</sup>   | 0.17±0.01 <sup>c</sup>     | 0.29±0.01 <sup>a</sup>   | 0.01 |
|                               | C18:0        | 5.63±0.07 <sup>c</sup>    | 5.80±0.05 <sup>bc</sup>  | 6.62±0.15 <sup>a</sup>   | 5.79±0.11 <sup>bc</sup>   | 6.03±0.23 <sup>b</sup>    | 4.41±0.12 <sup>e</sup>   | 5.52±0.02 <sup>c</sup>    | 5.54±0.40 <sup>c</sup>     | 5.13±0.04 <sup>d</sup>   | 0.30 |
|                               | C18:1c&t     | 35.33±0.47 <sup>de</sup>  | 38.01±0.24 <sup>b</sup>  | 44.17±1.09 <sup>a</sup>  | 33.89±0.80 <sup>ef</sup>  | 37.16±0.30 <sup>bc</sup>  | 27.87±0.44 <sup>g</sup>  | 36.04±0.06 <sup>cd</sup>  | 36.91±2.69 <sup>bcd</sup>  | 32.70±0.33 <sup>f</sup>  | 1.78 |
|                               | C18:2c&t     | 63.13±0.83 <sup>e</sup>   | 73.22±0.82 <sup>b</sup>  | 84.67±2.27 <sup>a</sup>  | 65.54±1.70 <sup>de</sup>  | 71.96±0.78 <sup>b</sup>   | 58.63±0.91 <sup>f</sup>  | 68.07±0.16 <sup>cd</sup>  | 70.54±5.24 <sup>bc</sup>   | 62.08±0.65 <sup>ef</sup> | 3.56 |
|                               | C18:3n3      | 11.89±0.16 <sup>c</sup>   | 12.72±0.21 <sup>b</sup>  | 14.29±0.40 <sup>a</sup>  | 11.24±0.31 <sup>d</sup>   | 12.39±0.19 <sup>bc</sup>  | 10.63±0.16 <sup>d</sup>  | 12.43±0.09 <sup>bc</sup>  | 12.58±0.95 <sup>b</sup>    | 10.94±0.11 <sup>d</sup>  | 0.66 |
|                               | C20:0        | 0.61±0.00 <sup>cde</sup>  | 0.63±0.01 <sup>cd</sup>  | 0.77±0.02 <sup>a</sup>   | 0.59±0.02 <sup>de</sup>   | 0.63±0.01 <sup>c</sup>    | 0.43±0.01 <sup>g</sup>   | 0.57±0.00 <sup>e</sup>    | 0.70±0.06 <sup>b</sup>     | 0.52±0.02 <sup>f</sup>   | 0.04 |
|                               | C20:1n9      | 0.51±0.03 <sup>b</sup>    | 0.55±0.02 <sup>a</sup>   | 0.59±0.01 <sup>a</sup>   | 0.48±0.01 <sup>c</sup>    | 0.47±0.02 <sup>c</sup>    | 0.33±0.02 <sup>e</sup>   | 0.47±0.01 <sup>c</sup>    | 0.37±0.04 <sup>d</sup>     | 0.26±0.01 <sup>f</sup>   | 0.04 |
|                               | C20:2        | 0.05±0.01 <sup>d</sup>    | 0.08±0.00 <sup>a</sup>   | 0.07±0.01 <sup>ab</sup>  | 0.06±0.00 <sup>cd</sup>   | 0.06±0.01 <sup>bc</sup>   | 0.05±0.00 <sup>cd</sup>  | 0.06±0.00 <sup>bc</sup>   | 0.06±0.00 <sup>bc</sup>    | 0.06±0.00 <sup>cd</sup>  | 0.01 |
|                               | C20:3n6&21:0 | 0.08±0.01 <sup>bcd</sup>  | 0.09±0.01 <sup>b</sup>   | 0.10±0.00 <sup>a</sup>   | 0.07±0.01 <sup>d</sup>    | 0.08±0.01 <sup>bc</sup>   | 0.07±0.01 <sup>cd</sup>  | 0.08±0.00 <sup>bcd</sup>  | 0.09±0.00 <sup>b</sup>     | 0.09±0.00 <sup>b</sup>   | 0.01 |
|                               | C22:0        | 0.99±0.01 <sup>bc</sup>   | 1.04±0.01 <sup>b</sup>   | 1.20±0.02 <sup>a</sup>   | 0.89±0.03 <sup>e</sup>    | 0.98±0.00 <sup>cd</sup>   | 0.71±0.01 <sup>f</sup>   | 0.95±0.00 <sup>cd</sup>   | 0.99±0.08 <sup>c</sup>     | 0.94±0.01 <sup>de</sup>  | 0.05 |
|                               | C22:1n9      | 0.05±0.01 <sup>abcd</sup> | 0.04±0.01 <sup>cd</sup>  | 0.05±0.00 <sup>abc</sup> | 0.04±0.02 <sup>d</sup>    | 0.06±0.01 <sup>a</sup>    | 0.06±0.01 <sup>ab</sup>  | 0.05±0.00 <sup>bcd</sup>  | 0.00±0.00 <sup>e</sup>     | 0.00±0.00 <sup>e</sup>   | 0.01 |
|                               | C23:0        | 0.12±0.00 <sup>b</sup>    | 0.12±0.01 <sup>b</sup>   | 0.15±0.02 <sup>a</sup>   | 0.12±0.00 <sup>bc</sup>   | 0.13±0.00 <sup>b</sup>    | 0.11±0.02 <sup>c</sup>   | 0.12±0.00 <sup>bc</sup>   | 0.12±0.01 <sup>bc</sup>    | 0.12±0.00 <sup>b</sup>   | 0.02 |
|                               | C24:0        | 0.29±0.01 <sup>c</sup>    | 0.32±0.01 <sup>b</sup>   | 0.35±0.01 <sup>ab</sup>  | 0.26±0.03 <sup>de</sup>   | 0.29±0.01 <sup>c</sup>    | 0.23±0.02 <sup>f</sup>   | 0.36±0.00 <sup>a</sup>    | 0.27±0.02 <sup>cd</sup>    | 0.24±0.01 <sup>ef</sup>  | 0.03 |
|                               | Total        | 135.56±1.77 <sup>de</sup> | 150.10±1.32 <sup>b</sup> | 173.52±4.39 <sup>a</sup> | 135.04±3.33 <sup>de</sup> | 147.69±0.79 <sup>bc</sup> | 117.03±1.67 <sup>f</sup> | 141.59±0.12 <sup>cd</sup> | 145.17±10.76 <sup>bc</sup> | 130.73±1.30 <sup>e</sup> | 7.14 |
|                               | ∑SFA         | 24.48±0.30 <sup>bc</sup>  | 25.37±0.17 <sup>b</sup>  | 29.55±0.66 <sup>a</sup>  | 23.70±0.52 <sup>c</sup>   | 25.47±0.24 <sup>b</sup>   | 19.39±0.24 <sup>d</sup>  | 24.35±0.09 <sup>bc</sup>  | 24.57±1.81 <sup>bc</sup>   | 24.54±0.22 <sup>bc</sup> | 1.18 |
|                               | ∑UFA         | 111.08±1.47 <sup>e</sup>  | 124.73±1.21 <sup>b</sup> | 143.97±3.73 <sup>a</sup> | 111.34±2.82 <sup>de</sup> | 122.22±0.92 <sup>bc</sup> | 97.64±1.51 <sup>f</sup>  | 117.24±0.21 <sup>cd</sup> | 120.60±8.94 <sup>bc</sup>  | 106.19±1.08 <sup>e</sup> | 5.99 |

∑SFA; sum of saturated fatty acids, ∑UFA; sum of unsaturated fatty acids.

**Table S12.** Fatty acid content of roasted soybean flour packed in polypropylene film under high temperature condition during storage ( $\text{mg}\cdot\text{g}^{-1}$ , dry basis,  $p < 0.05$ ,  $n = 3$ ).

|              | Storage duration          |                          |                          |                          |                           |                           |                          |                          |                          |      |
|--------------|---------------------------|--------------------------|--------------------------|--------------------------|---------------------------|---------------------------|--------------------------|--------------------------|--------------------------|------|
|              | Initial                   | 1W                       | 2W                       | 4W                       | 8W                        | 12W                       | 24W                      | 36W                      | 48W                      | LSD  |
| C6:0         | 0.04±0.00 <sup>b</sup>    | 0.03±0.00 <sup>b</sup>   | 0.03±0.00 <sup>bc</sup>  | 0.03±0.00 <sup>bc</sup>  | 0.04±0.00 <sup>b</sup>    | 0.02±0.00 <sup>c</sup>    | 1.51±0.02 <sup>a</sup>   | 0.00±0.00 <sup>d</sup>   | 0.00±0.00 <sup>d</sup>   | 0.01 |
| C14:0        | 0.19±0.02 <sup>c</sup>    | 0.19±0.01 <sup>c</sup>   | 0.19±0.01 <sup>c</sup>   | 0.12±0.01 <sup>d</sup>   | 0.13±0.01 <sup>d</sup>    | 0.12±0.01 <sup>d</sup>    | 0.12±0.01 <sup>d</sup>   | 0.44±0.01 <sup>a</sup>   | 0.42±0.01 <sup>b</sup>   | 0.02 |
| C16:0        | 16.36±0.21 <sup>d</sup>   | 16.93±0.06 <sup>c</sup>  | 19.94±0.68 <sup>a</sup>  | 17.74±0.33 <sup>b</sup>  | 17.27±0.11 <sup>bc</sup>  | 14.85±0.11 <sup>f</sup>   | 16.04±0.09 <sup>de</sup> | 15.80±0.10 <sup>e</sup>  | 16.14±0.11 <sup>de</sup> | 0.47 |
| C16:1        | 0.10±0.00 <sup>d</sup>    | 0.11±0.00 <sup>d</sup>   | 0.13±0.01 <sup>bc</sup>  | 0.11±0.01 <sup>cd</sup>  | 0.11±0.01 <sup>d</sup>    | 0.10±0.00 <sup>d</sup>    | 0.17±0.03 <sup>bc</sup>  | 0.14±0.01 <sup>b</sup>   | 0.11±0.02 <sup>d</sup>   | 0.02 |
| C17:0        | 0.16±0.01 <sup>de</sup>   | 0.18±0.01 <sup>cd</sup>  | 0.19±0.00 <sup>b</sup>   | 0.19±0.01 <sup>bc</sup>  | 0.18±0.00 <sup>c</sup>    | 0.16±0.00 <sup>e</sup>    | 0.16±0.00 <sup>e</sup>   | 0.16±0.00 <sup>e</sup>   | 0.27±0.01 <sup>a</sup>   | 0.01 |
| C18:0        | 5.63±0.07 <sup>cd</sup>   | 5.82±0.03 <sup>c</sup>   | 6.65±0.22 <sup>a</sup>   | 6.48±0.40 <sup>ab</sup>  | 6.29±0.33 <sup>b</sup>    | 5.04±0.12 <sup>fg</sup>   | 5.40±0.04 <sup>de</sup>  | 5.22±0.03 <sup>ef</sup>  | 4.85±0.05 <sup>g</sup>   | 0.37 |
| C18:1c&t     | 35.33±0.47 <sup>bcd</sup> | 37.96±0.25 <sup>bc</sup> | 44.38±1.51 <sup>a</sup>  | 38.50±0.65 <sup>ab</sup> | 31.46±10.27 <sup>de</sup> | 32.04±0.46 <sup>cde</sup> | 26.64±0.14 <sup>ef</sup> | 24.53±0.31 <sup>f</sup>  | 21.90±0.19 <sup>f</sup>  | 5.96 |
| C18:2c&t     | 63.13±0.83 <sup>d</sup>   | 73.06±0.77 <sup>bc</sup> | 85.16±3.18 <sup>a</sup>  | 74.24±1.49 <sup>b</sup>  | 71.67±0.30 <sup>c</sup>   | 64.76±0.72 <sup>d</sup>   | 6.05±0.11 <sup>e</sup>   | 3.86±0.17 <sup>f</sup>   | 3.30±0.14 <sup>f</sup>   | 2.16 |
| C18:3n3      | 11.89±0.16 <sup>c</sup>   | 12.69±0.19 <sup>b</sup>  | 14.41±0.58 <sup>a</sup>  | 12.69±0.28 <sup>b</sup>  | 12.11±0.04 <sup>c</sup>   | 11.22±0.14 <sup>d</sup>   | 0.45±0.01 <sup>e</sup>   | 0.27±0.01 <sup>e</sup>   | 0.24±0.02 <sup>e</sup>   | 0.40 |
| C20:0        | 0.61±0.00 <sup>d</sup>    | 0.63±0.01 <sup>c</sup>   | 0.77±0.01 <sup>a</sup>   | 0.66±0.02 <sup>b</sup>   | 0.62±0.01 <sup>cd</sup>   | 0.51±0.00 <sup>f</sup>    | 0.57±0.00 <sup>e</sup>   | 0.61±0.01 <sup>d</sup>   | 0.58±0.00 <sup>e</sup>   | 0.02 |
| C20:1n9      | 0.51±0.03 <sup>bc</sup>   | 0.54±0.02 <sup>bc</sup>  | 0.56±0.04 <sup>b</sup>   | 0.53±0.01 <sup>bc</sup>  | 0.50±0.02 <sup>c</sup>    | 0.39±0.00 <sup>d</sup>    | 1.32±0.08 <sup>a</sup>   | 0.28±0.00 <sup>e</sup>   | 0.25±0.01 <sup>e</sup>   | 0.06 |
| C20:2        | 0.05±0.01 <sup>d</sup>    | 0.07±0.01 <sup>ab</sup>  | 0.07±0.00 <sup>a</sup>   | 0.06±0.00 <sup>bc</sup>  | 0.06±0.01 <sup>bc</sup>   | 0.06±0.01 <sup>cd</sup>   | 0.00±0.00 <sup>e</sup>   | 0.00±0.00 <sup>e</sup>   | 0.00±0.00 <sup>e</sup>   | 0.01 |
| C20:3n6&21:0 | 0.08±0.01 <sup>de</sup>   | 0.09±0.01 <sup>cd</sup>  | 0.10±0.00 <sup>bc</sup>  | 0.08±0.01 <sup>de</sup>  | 0.09±0.01 <sup>cde</sup>  | 0.07±0.01 <sup>e</sup>    | 0.07±0.00 <sup>e</sup>   | 0.12±0.00 <sup>ab</sup>  | 0.13±0.01 <sup>a</sup>   | 0.02 |
| C22:0        | 0.99±0.01 <sup>c</sup>    | 1.03±0.01 <sup>b</sup>   | 1.22±0.04 <sup>a</sup>   | 1.03±0.02 <sup>b</sup>   | 0.99±0.01 <sup>c</sup>    | 0.85±0.01 <sup>e</sup>    | 0.93±0.01 <sup>d</sup>   | 1.00±0.01 <sup>c</sup>   | 1.01±0.01 <sup>bc</sup>  | 0.03 |
| C22:1n9      | 0.05±0.01 <sup>b</sup>    | 0.05±0.01 <sup>b</sup>   | 0.06±0.01 <sup>b</sup>   | 0.04±0.00 <sup>b</sup>   | 0.06±0.01 <sup>b</sup>    | 0.09±0.00 <sup>b</sup>    | 0.10±0.01 <sup>b</sup>   | 0.27±0.01 <sup>a</sup>   | 0.22±0.12 <sup>a</sup>   | 0.07 |
| C23:0        | 0.12±0.00 <sup>bcd</sup>  | 0.13±0.01 <sup>bc</sup>  | 0.15±0.01 <sup>a</sup>   | 0.13±0.00 <sup>bc</sup>  | 0.12±0.00 <sup>bcd</sup>  | 0.11±0.01 <sup>d</sup>    | 0.11±0.01 <sup>d</sup>   | 0.13±0.01 <sup>b</sup>   | 0.12±0.01 <sup>cd</sup>  | 0.01 |
| C24:0        | 0.29±0.01 <sup>c</sup>    | 0.31±0.01 <sup>bc</sup>  | 0.36±0.01 <sup>a</sup>   | 0.30±0.01 <sup>c</sup>   | 0.30±0.01 <sup>c</sup>    | 0.24±0.01 <sup>d</sup>    | 0.38±0.01 <sup>a</sup>   | 0.31±0.01 <sup>bc</sup>  | 0.32±0.03 <sup>b</sup>   | 0.02 |
| Total        | 135.56±1.77 <sup>cd</sup> | 149.81±1.27 <sup>b</sup> | 174.37±6.20 <sup>a</sup> | 152.93±3.00 <sup>b</sup> | 141.98±10.55 <sup>c</sup> | 130.63±1.30 <sup>d</sup>  | 60.02±0.25 <sup>e</sup>  | 53.13±0.65 <sup>ef</sup> | 49.86±0.46 <sup>f</sup>  | 7.36 |
| ∑SFA         | 24.48±0.30 <sup>d</sup>   | 25.34±0.11 <sup>c</sup>  | 29.60±0.96 <sup>a</sup>  | 26.76±0.72 <sup>b</sup>  | 26.01±0.42 <sup>bc</sup>  | 21.97±0.05 <sup>e</sup>   | 25.29±0.16 <sup>c</sup>  | 23.79±0.16 <sup>d</sup>  | 23.84±0.17 <sup>d</sup>  | 0.77 |
| ∑UFA         | 111.08±1.47 <sup>cd</sup> | 124.47±1.17 <sup>b</sup> | 144.77±5.26 <sup>a</sup> | 126.17±2.42 <sup>b</sup> | 115.97±10.16 <sup>c</sup> | 108.66±1.30 <sup>d</sup>  | 34.73±0.09 <sup>e</sup>  | 29.34±0.50 <sup>ef</sup> | 26.02±0.30 <sup>f</sup>  | 6.82 |

∑SFA; sum of saturated fatty acids, ∑UFA; sum of unsaturated fatty acid.

**Initiation:**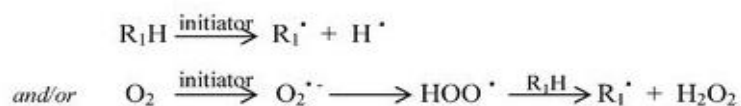**Propagation:**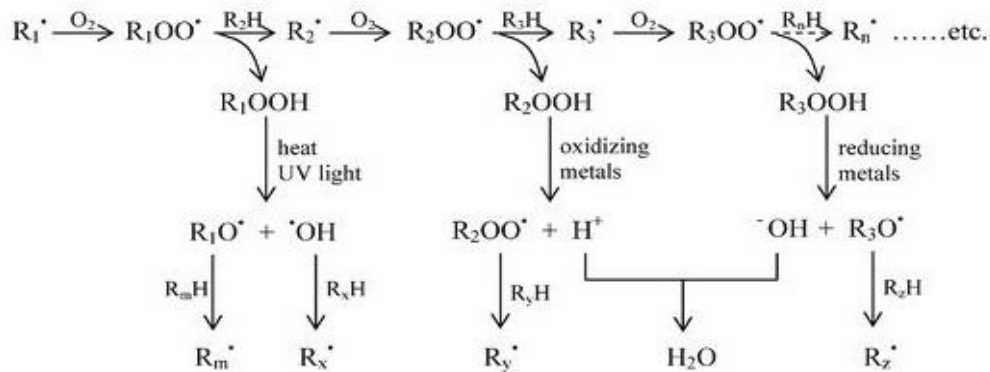**Termination:**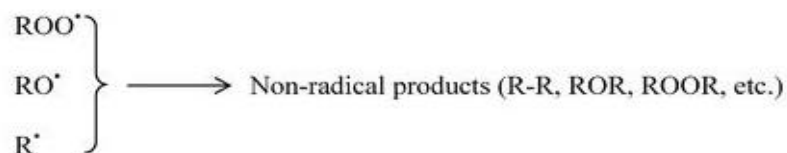

**Figure S1.** Three steps of lipid autoxidation and the pathways of complex chemical changes that occur through free radical chain mechanisms.

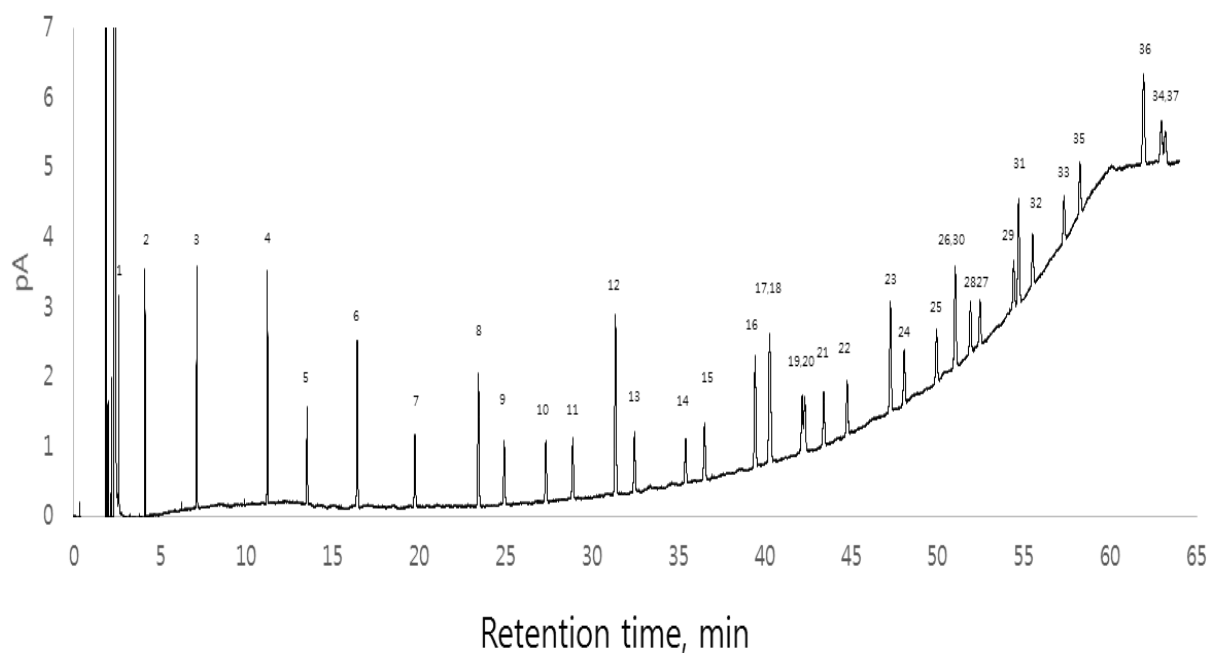

**Figure S2.** Chromatograms of the 37-fatty acid methyl ester standard mixture. 1, C4:0; 2, C6:0; 3, C8:0; 4, C10:0; 5, C11:0; 6, C12:0; 7, C13:0; 8, C14:0; 9, C14:1; 10, C15:0; 11, C15:1; 12, C16:0; 13, C16:1; 14, C17:0; 15, C17:1; 16, C18:0; 17 and 18, C18:1n9 t and c; 19 and 20, C18:2n6 t and c; 21, C18:3n6; 22, C18:3n3; 23, C20:0; 24, C20:1; 25, C20:2; 26 and 30, C20:3n6 and C21:0; 27, C20:3n3; 28, C20:4n6; 29, C20:5n3; 31, C22:0; 32, C22:1n9; 33, C22:2; 35, C23:0; 36, C24:0; 34 and 37, C22:6n3 and C24:1n9.

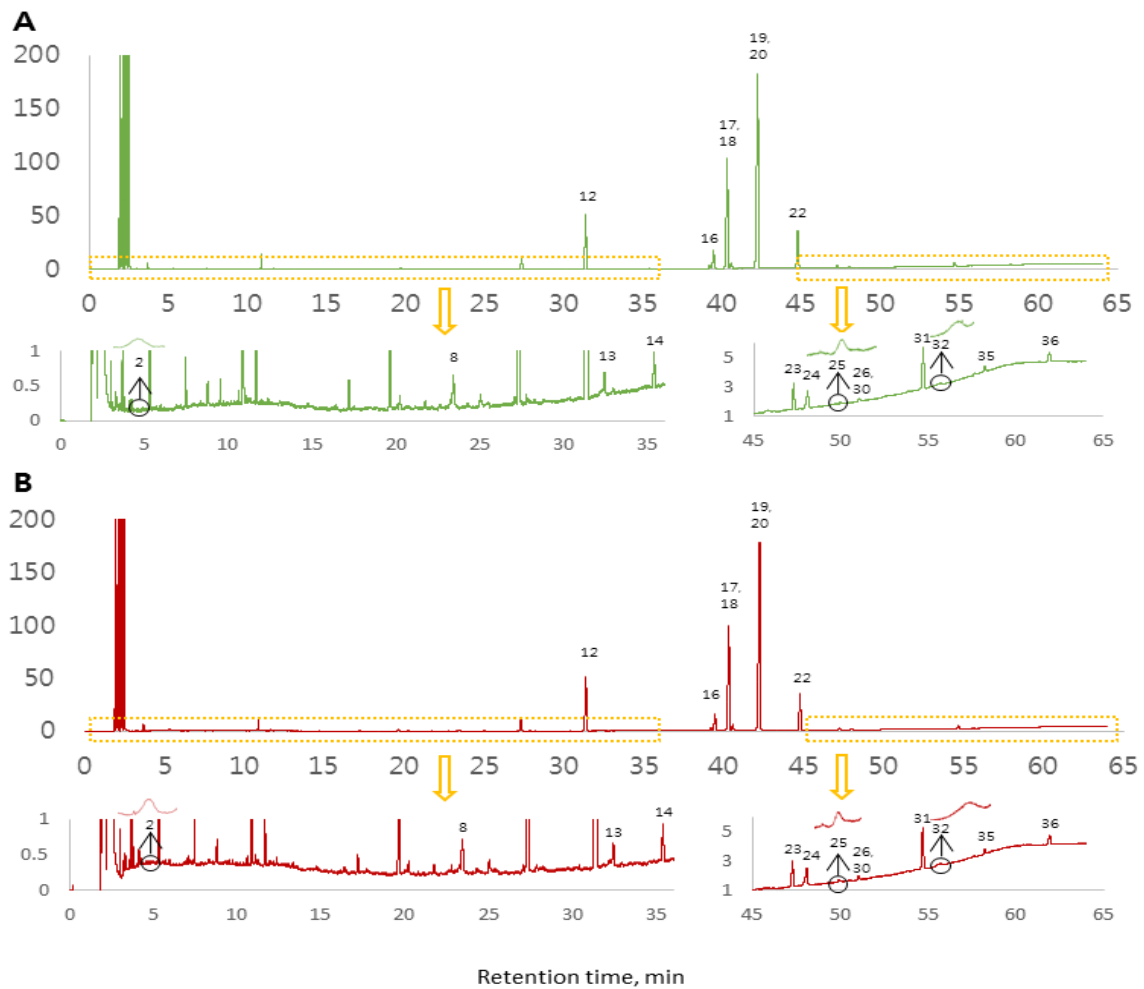

**Figure S3.** Chromatograms of the raw soybean flour (A) and roasted soybean flour (B) prior to storage. Arrow represents exclusive region at mentioned retention time.



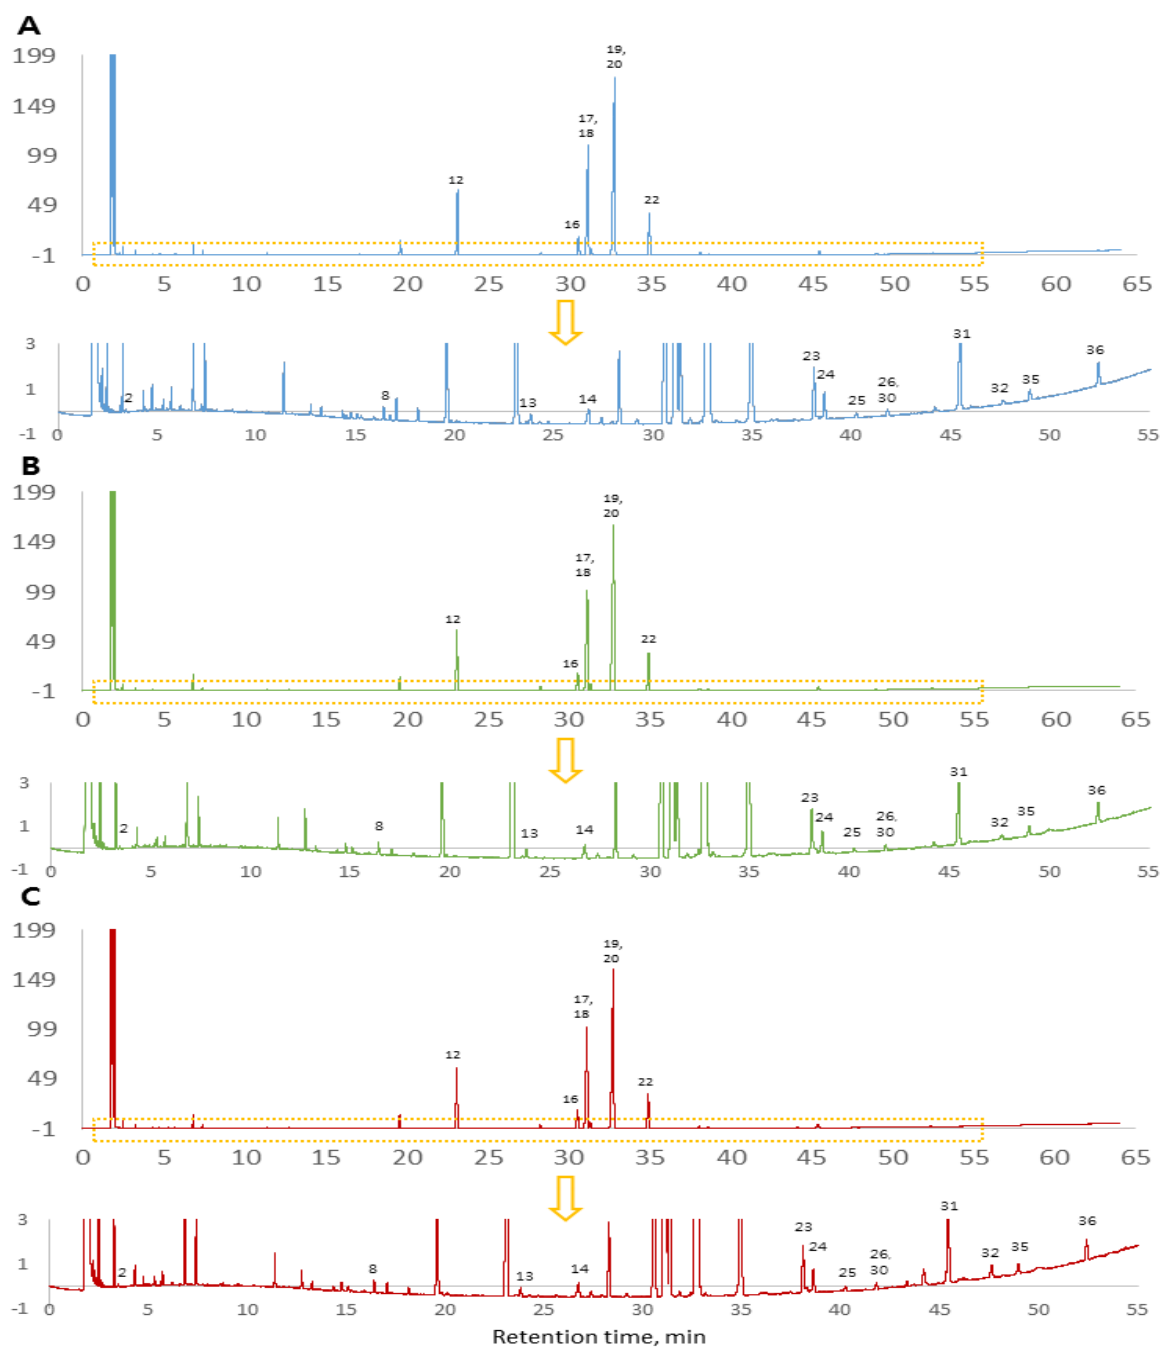

**Figure S4.** Chromatograms of raw soybean flour packed in polyethylene film. Stored in refrigeration (4°C) (A), room temperature (20°C) (B), and high temperature (45°C) (C) conditions for 48 weeks. **Arrow represents exclusive region at mentioned retention time.**

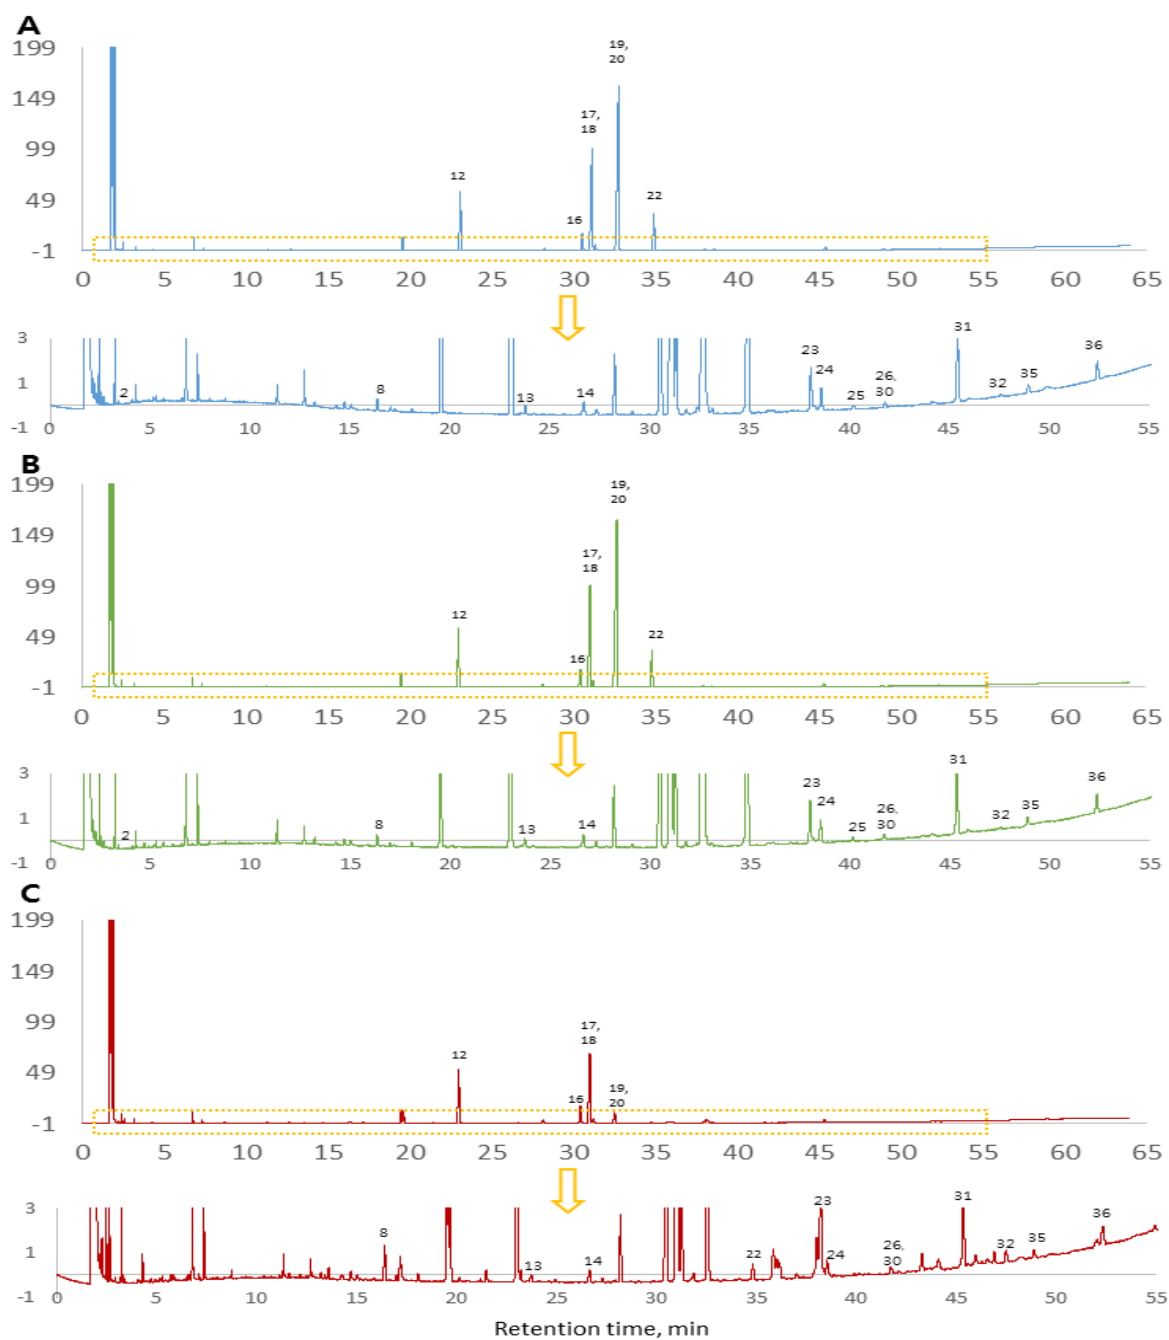

**Figure S5.** Chromatograms of roasted soybean flour packed in polyethylene film. Stored in refrigeration (4°C) (A), room temperature (20°C) (B), and high temperature (45°C) (C) conditions for 48 weeks. **Arrow represents exclusive region at mentioned retention time.**

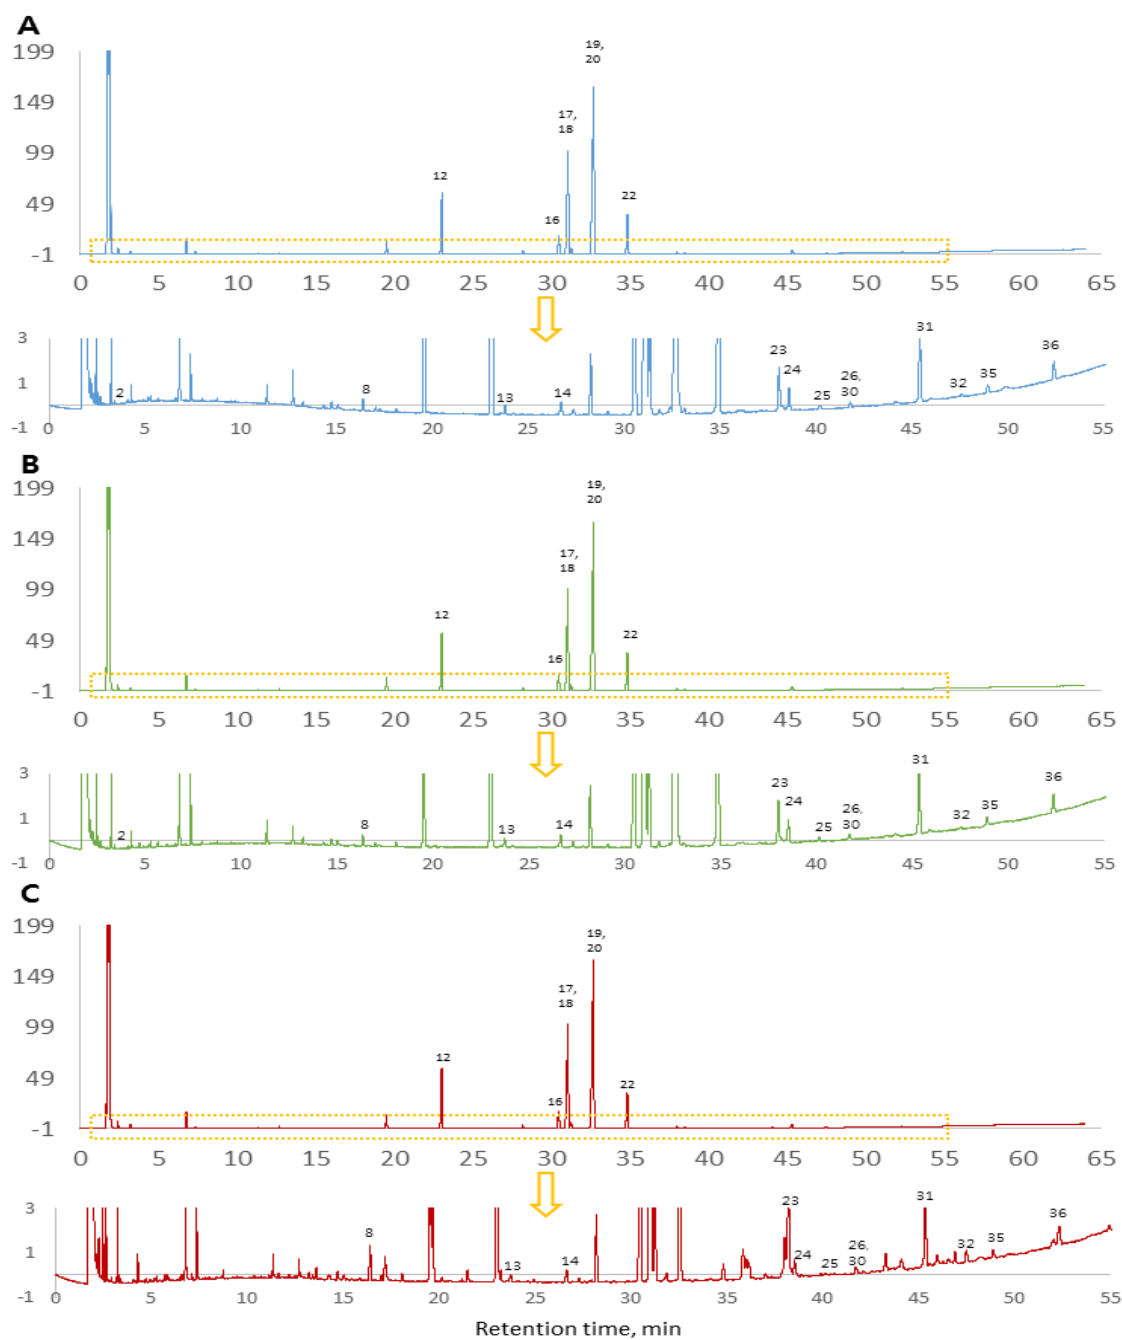

**Figure S6.** Chromatograms of raw soybean flour packed in polypropylene film. Stored in refrigeration (4°C) (A), room temperature (20°C) (B), and high temperature (45°C) (C) conditions for 48 weeks. **Arrow represents exclusive region at mentioned retention time.**

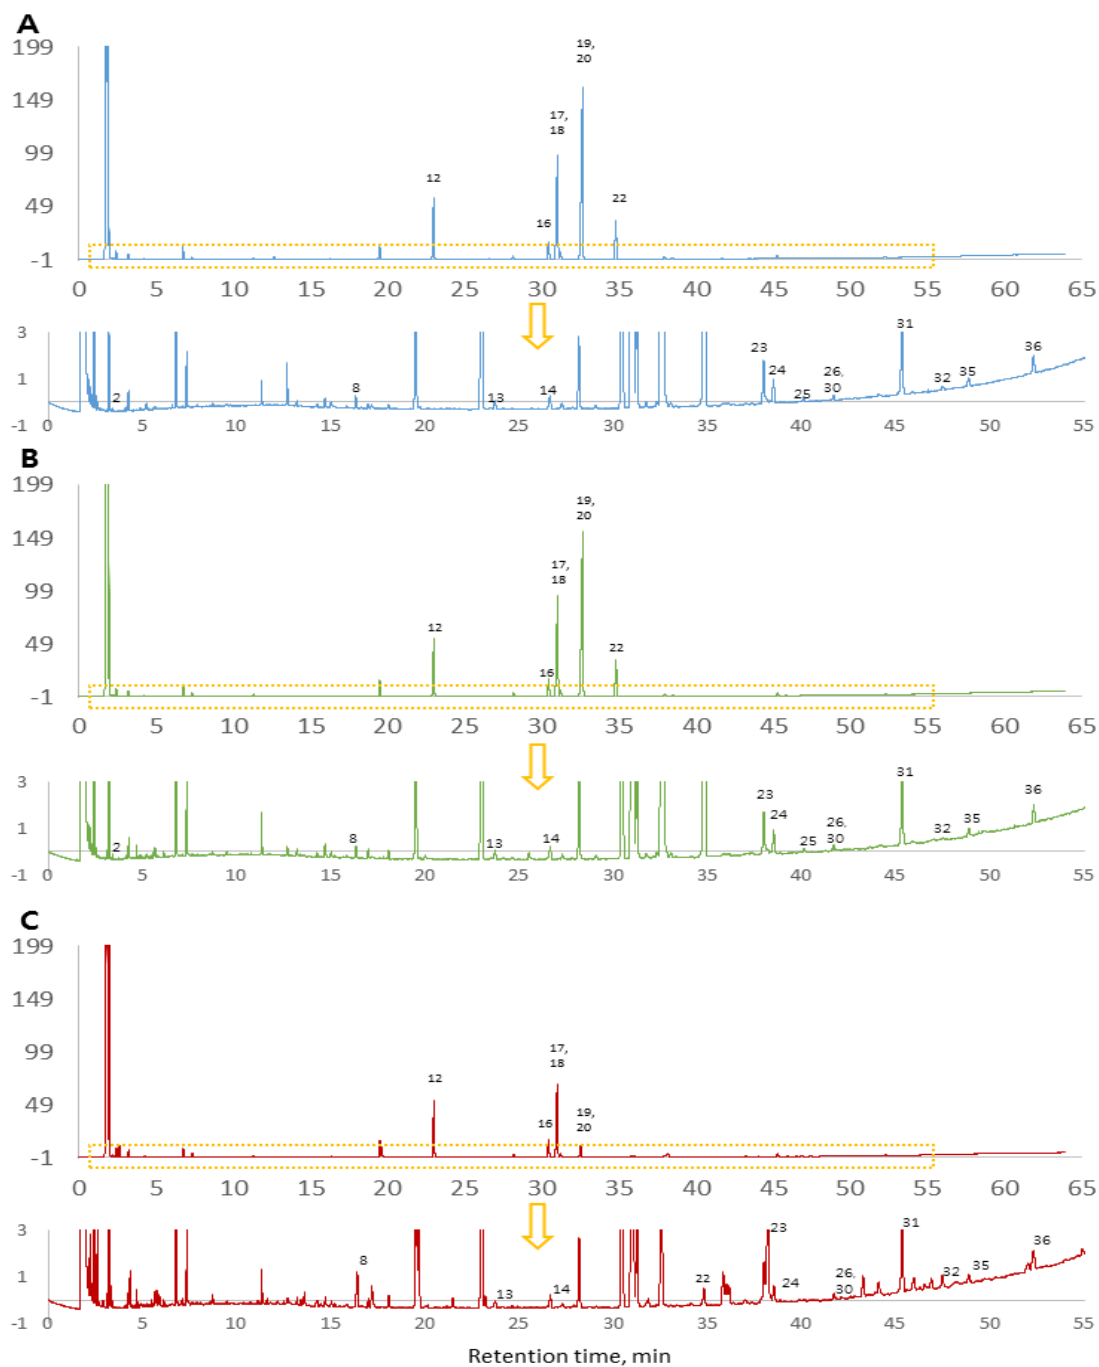

**Figure S7.** Chromatograms of roasted soybean flour packed in polypropylene film. Stored in refrigeration (4°C) (A), room temperature (20°C) (B), and high temperature (45°C) (C) conditions for 48 weeks. **Arrow represents exclusive region at mentioned retention time.**
